1 **RNA targeting with CRISPR-Cas13a facilitates bacteriophage genome**  
2 **engineering**

3

4 Jingwen Guan,<sup>1</sup> Agnès Oromí-Bosch,<sup>2</sup> Senén D. Mendoza,<sup>1+</sup> Shweta Karambelkar,<sup>1</sup> Joel Berry,<sup>2</sup>  
5 Joseph Bondy-Denomy<sup>1,3,4,\*</sup>

6

7 <sup>1</sup>Department of Microbiology & Immunology, University of California, San Francisco, San Francisco, CA,  
8 USA

9 <sup>2</sup>Felix Biotechnology, South San Francisco, CA, USA

10 <sup>3</sup>Quantitative Biosciences Institute, University of California, San Francisco, San Francisco, CA, USA

11 <sup>4</sup>Innovative Genomics Institute, Berkeley, CA, USA

12 <sup>+</sup>Present address: Department of Biology, Massachusetts Institute of Technology, Cambridge, MA, USA

13 <sup>\*</sup>Corresponding author: [joseph.bondy-denomy@ucsf.edu](mailto:joseph.bondy-denomy@ucsf.edu)

14 **Graphical abstract**

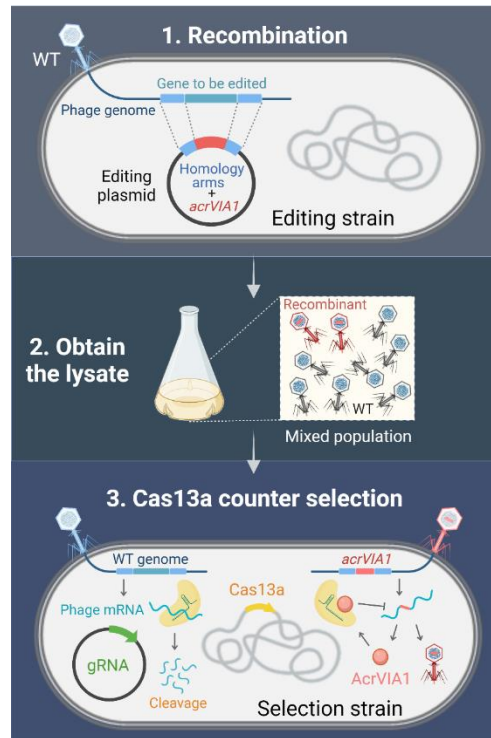

15

16

17 **Abstract**

18 The viruses that infect bacteria, bacteriophages (or phages), possess numerous genes of  
19 unknown function. Genetic tools are required to understand their biology and enhance their  
20 efficacy as antimicrobials. *Pseudomonas aeruginosa* jumbo phage  $\Phi$ KZ and its relatives are a  
21 broad host range phage family that assemble a proteinaceous “phage nucleus” structure during  
22 infection. Due to the phage nucleus, DNA-targeting CRISPR-Cas is ineffective against this phage  
23 and thus there are currently no reverse genetic tools for this family. Here, we develop a DNA  
24 phage genome editing technology using the RNA-targeting CRISPR-Cas13a enzyme as a  
25 selection tool, an anti-CRISPR gene (*acrVIA1*) as a selectable marker, and homologous  
26 recombination. Precise insertion of foreign genes, gene deletions, and the addition of  
27 chromosomal fluorescent tags into the  $\Phi$ KZ genome were achieved. Deletion of *phuZ*, which  
28 encodes a tubulin-like protein that centers the phage nucleus during infection, led to the  
29 mispositioning of the phage nucleus but surprisingly had no impact on phage replication, despite  
30 a proposed role in capsid trafficking. A chromosomal fluorescent tag placed on gp93, a proposed  
31 “inner body” protein in the phage head revealed a protein that is injected with the phage genome,  
32 localizes with the maturing phage nucleus, and is massively synthesized around the phage  
33 nucleus late in infection. Successful editing of two other phages that resist DNA-targeting  
34 CRISPR-Cas systems [OMKO1 ( $\Phi$ KZ-like) and PaMx41] demonstrates the flexibility of this  
35 method. RNA-targeting Cas13a system holds great promise for becoming a universal genetic  
36 editing tool for intractable phages. This phage genetic engineering platform enables the  
37 systematic study of phage genes of unknown function and the precise modification of phages for  
38 use in a variety of applications.

## 39 Introduction

40 Bacteriophages are viruses that infect bacteria and can cause their lysis after replication.  
41 In recent decades, the rapid emergence of multi-antibiotic resistant bacterial pathogens and  
42 simultaneous decline in the discovery of new antibiotics has rekindled interest in the use of phages  
43 as alternative antimicrobial therapeutics (phage therapy) [1, 2]. Phages offer many advantages  
44 over antibiotics, including high specificity and efficient self-propagation in the presence of their  
45 bacterial host [3-5]. However, host range limitations and the rapid emergence of phage resistance  
46 in clinical strains present barriers for furthering phage therapy [1, 3, 6]. Phage genome  
47 engineering may help overcome these hurdles [7, 8]. Robust phage engineering tools can aid  
48 fundamental discoveries, broaden host range, enhance evasion of host antiviral defense systems,  
49 and reduce phage toxicity and immunogenicity [9-12]. Phage engineering techniques often utilize  
50 homologous recombination (HR) with a template plasmid [13, 14], coupled with a selective  
51 pressure such as CRISPR-Cas targeting. CRISPR-Cas systems (clustered regularly interspaced  
52 short palindromic repeats and CRISPR-associated proteins) are adaptive anti-phage immune  
53 systems in prokaryotes [15, 16]. CRISPR-Cas programmable targeting enables effective  
54 enrichment for phage recombinants by removing wild-type phages from the population and has  
55 been coupled with the integration of an anti-CRISPR gene as a selectable marker [17].

56 To date, all CRISPR-based screening tools used in phage engineering recognize and  
57 target phage genomic DNA. However, due to the everlasting evolutionary battle between bacteria  
58 and phages in nature, phages have amassed various strategies to circumvent DNA-targeting  
59 immunity, including anti-CRISPR proteins, DNA base modifications, and genome segregation [18,  
60 19]. *P. aeruginosa* jumbo phage  $\Phi$ KZ is resistant to a broad spectrum of DNA-targeting immune  
61 systems via assembly of a proteinaceous “phage nucleus” structure that shields phage DNA  
62 during replication [20, 21]. This phage family is thus a great candidate for use as a phage  
63 therapeutic and likely possesses other fascinating fundamental biology. However, no genetic tools  
64 are available for this phage family and most studies have relied on plasmid-based over-  
65 expression [22].

66 Although the phage nucleus prevents DNA-targeting, the mRNA-targeting CRISPR-  
67 Cas13a system (type VI-A) [23] effectively inhibits  $\Phi$ KZ replication by degrading phage mRNA  
68 that is exported from the phage nucleus to the cytoplasm [20]. Here, we develop the CRISPR-  
69 Cas13a system as a novel genetic engineering approach for  $\Phi$ KZ. Using Cas13a to target an  
70 essential transcript, we select for phage DNA that has undergone homologous recombination  
71 resulting in a desired genetic change along with the acquisition of an anti-Cas13a *trans* gene,  
72 *acrVIA1* (derived from Listeriophage  $\Phi$ LS46 [24]), as a selectable marker. This approach allows  
73 us to precisely insert foreign gene fragments into the  $\Phi$ KZ genome, knock out non-essential genes,  
74 and fuse fluorescent tags to individual genes. Importantly, the same guide can be used for any  
75 genomic manipulation of a single phage as engineered phages are identified based on the  
76 acquisition of the Cas13a inhibitor, not a change in the target sequence. Our work establishes a  
77 Cas13a-based phage engineering strategy that could be a universally powerful tool for  
78 engineering phages.

## 79 Results

### 80 Optimization of CRISPR-Cas13a for efficient phage targeting

81 Cas13a is an RNA-guided RNA nuclease that can block  $\Phi$ KZ replication in *P. aeruginosa*  
82 PAO1. We previously targeted  $\Phi$ KZ by expressing crRNA guides from a plasmid (Figure 1A,  
83 Version 1) [20]. For the effective elimination of WT phages in the population, we first sought to  
84 enhance activity of crRNA guides. We designed Version 2 (V2) with the repeat-spacer-repeat unit  
85 moved to the +1 transcription start site and the second direct repeat (DR) mutated to remove  
86 repeat homology (Figure 1A). To further stabilize the crRNA cassette, we omitted the second DR  
87 and generated V3 (Figure 1A), which could prevent recombination between the repeats. Using  
88 the same spacer, both V2 and V3 provided more robust defense against phage JBD30 and  $\Phi$ KZ  
89 compared with V1 (Figure 1A). For simplicity, we selected the V3 cassette that has a single repeat  
90 to express crRNAs against  $\Phi$ KZ. We designed multiple spacer sequences to target various  $\Phi$ KZ  
91 gene transcripts. Strong targeting was observed for some crRNAs, to the point that escaper  
92 phages could be isolated, such as the two spacers matching *orf120* and *orf146* transcripts, but  
93 not all crRNAs were efficacious (Figure 1B and S1). Given the variability of targeting efficiency,  
94 for the remainder of this report, we use *orf120*-targeting gRNA#2 as our primary guide to screen  
95 for engineered phages. We refer the PAO1 strain simultaneously expressing Cas13a and *orf120*-  
96 gRNA#2 to as Cas13a counter-selection strain. We describe below how the same guide can be  
97 used to facilitate the engineering of distinct genomic loci.

### 98 Isolation of $\Phi$ KZ recombinants by CRISPR-Cas13a counter selection

99 To avoid disrupting any essential genes that are required for phage replication, we first  
100 attempted to insert *acrVIA1* immediately downstream of  $\Phi$ KZ major capsid gene (*orf120*). A  
101 template DNA substrate for homologous recombination, composed of ~600-bp homology arms  
102 flanking *acrVIA1* was cloned into a plasmid, referred to as an editing plasmid (Figure 2A). After  
103 infecting a PAO1 strain with the editing plasmid to allow recombination, the phage lysate was then  
104 titrated on a lawn of the Cas13a counter-selection strain to eliminate WT phages. To screen for  
105 recombinants, individual plaques were examined for *acrVIA1* integration via PCR, showing that 8  
106 out of the 16 tested phage plaques generated the expected 1.6 kbp band, which was not  
107 detectable in a WT plaque (Figure 2B). Amplification of the entire region also revealed the  
108 expected size increase, from ~1.7 kbp of WT to ~2.5 kbp of recombinants, and Sanger sequencing  
109 confirmed the correct integration junction (Figure 2C). Recombinant phages propagated well on  
110 hosts expressing crRNAs targeting other genomic loci due to the expression of *acrVIA1*, which  
111 abolishes Cas13a immunity regardless of the crRNA sequence (Figure 2D). Three randomly  
112 selected phages that escaped Cas13a targeting but screened negative for the *acrVIA1* integration  
113 contained genomic deletions ranging from 27 bp to 69 bp starting immediately downstream of the  
114 *orf120* stop codon, disrupting the protospacer (Figure S2). While the crRNA used is therefore not  
115 inescapable, the recombination efficiency to insert the selectable marker is clearly efficient  
116 enough to enable facile identification of the desired mutants.

117 To test the flexibility of this nascent genetic technology (Figure 2E) and generate new  
118 biological insights of phage  $\Phi$ KZ, we next knocked out (or attempted to knock out) multiple genes;  
119 *phuZ* (*orf39*), *orf54*, *orf89-orf93*, *orf93*, *orf146*, *orf241*, and *orf241-orf242* (summarized in Table  
120 1), in addition to attempting to add chromosomal fluorescent tags onto *orf54* and *orf93*. The  
121 successes, failures, and new insights gained are discussed below. Whole genome sequencing of  
122 two deletion mutants,  $\Delta$ *phuZ* and  $\Delta$ *orf93*, revealed no other mutations. The accuracy of this

123 system highlights an important advantage of adapting an RNA-targeting system to select for edits  
124 in DNA phage genomes, compared to direct DNA cleavage.

### 125 **Characterization of PhuZ and gp93 using engineered $\Phi$ KZ mutants**

126 PhuZ (gp39) is a tubulin homolog conserved across “group 1” jumbo phages and some  
127 megaphages [25, 26]. It assembles a bipolar spindle to center the phage nucleus during phage  
128 intracellular development [27, 28], and “treadmill” newly synthesized phage capsids from the cell  
129 inner membrane to the phage nucleus for DNA packaging [29]. These functions made us  
130 speculate that PhuZ might be essential for phage growth, however, this is not the case.  $\Delta$ *phuZ*  
131 mutants exhibited a similar burst size (24 phage particles per infected bacterial cell vs. 19 of WT  
132 phage) under our experimental conditions. While cells infected with WT phages or  $\Delta$ *phuZ* mutants  
133 complemented *in trans* had phage nuclei in the center of the cell ~80% of the time, the localization  
134 of the phage nucleus showed a wide distribution in cells infected by  $\Delta$ *phuZ* mutants (Figure 3A-  
135 3B, Movie S1). This is consistent with the previous findings that *trans* over-expression of catalytic  
136 mutant PhuZ resulted in mispositioning of the phage nucleus [28, 30]. ~25% of mutant-infected  
137 cells still positioned the phage nucleus at the cell center (Figure 3B), a phenotype most commonly  
138 seen in shorter cells (*Pearson* correlation coefficient = 0.486,  $p < 0.001$ ), in contrast with WT  
139 infection where no correlation was observed (*Pearson* correlation coefficient = 0.029,  $p = 0.505$ )  
140 (Figure 3C). Considering that PhuZ is proposed to traffic phage capsids from the cell inner  
141 membrane to the phage nucleus [29, 31], we speculate that this is only required under specific  
142 conditions or not at all. Taken together, these data suggested that PhuZ positions the phage  
143 nucleus at the cell center during infection, but the removal of PhuZ does not have a significant  
144 impact on  $\Phi$ KZ growth in laboratory conditions.

145 *orf93* encodes gp93, a high copy number “inner body (IB)” protein that is packaged in the  
146 phage head [32, 33]. Deletion of *orf93* also yielded viable phage with no obvious growth defect.  
147 We next analyzed an inserted fluorescent chromosomal label at the C-terminus of the protein,  
148 which is notable as the first chromosomal protein tag in this phage family. Labeled gp93 was  
149 observed in the mature virion (Figure 4A), as predicted by previous mass spectrometry studies  
150 [33]. Excitingly, time-lapse movies revealed the fluorescently labeled protein being injected with  
151 the phage DNA at the cell pole (Figure 4B, Movie S2) and subsequently translocating to the cell  
152 center where it remained bound to the phage nucleus. As new gp93-mNeonGreen was expressed  
153 from the phage genome, more and more green signals concentrated on the surface of the phage  
154 nucleus, while some foci appeared on the cell inner membrane. Finally, cells lysed and released  
155 fluorescent phage progeny. To confirm that the protein that appears to be injected was not rapidly  
156 synthesized *de novo*, we monitored the infection behaviors of WT phages loaded with gp93-  
157 mNeonGreen expressed from a plasmid during phage production, but where no new fluorescent  
158 protein could be made during infection (Figure 4C, Movie S3). Similar to the engineered phage,  
159 the phage particles were fluorescent, injected the labeled protein, and the green focus migrated  
160 from the cell pole to the cell center along with phage DNA on the surface of the phage nucleus  
161 until cell lysis. Therefore, the IB protein gp93 is not only packaged in the phage head, but may  
162 also play a role in phage development and maturation. The ability to chromosomally label phage  
163 proteins, as demonstrated here, will be beneficial for characterizing  $\Phi$ KZ virion and cell biology in  
164 the future.

165 To assess whether the deletions of *phuZ* or *orf93* impact growth in a strain-dependent  
166 manner, we challenged a panel of 21 *P. aeruginosa* clinical strains with the mutant phages.  
167 Plaque assays showed that host ranges of both mutants were quite similar to WT (Figure 3D, S3),



168 suggesting that these knockouts, and Cas13a-mediated genetic engineering in general, has no  
169 impact on the  $\Phi$ KZ host range.

170 The phage nucleus is primarily composed of gp54 [28]. We were unable to knockout or  
171 fluorescently label *orf54*, even when wild-type gp54 was provided by expressing from a plasmid  
172 *in trans*. The primers used to amplify the region of editing generated multiple bands for both  
173 deletion and tag-addition mutant variants (Figure S4A). N- or C-terminal fusion of gp54 with  
174 mCherry tags yielded similar results. Whole genome sequencing of an isolated *orf54* “pseudo  
175 knock-out” strain revealed that part of the editing plasmid was integrated upstream of *orf54*, while  
176 the *orf54* gene was left intact (Figure S4B). A similar attempt to delete the structural gene (*orf146*)  
177 and a cluster of IB genes (*orf89-orf93*) also failed, while deletion of accessory genes *orf241* and  
178 *orf241-242* succeeded but yielded no obvious phenotype. These results highlighted that the  
179 CRISPR-Cas13a counter selection system is a strong and efficient phage genome engineering  
180 tool, but the modification of phage essential genes remains challenging.

### 181 **Precise genome engineering of clinical phage OMKO1**

182 We next explored the versatility of our phage engineering platform by editing the genome  
183 of a clinical jumbo phage. We selected OMKO1, a *P. aeruginosa* phage with a ~280 kbp genome  
184 that has high sequence identity to  $\Phi$ KZ (98.23%). OMKO1 can drive re-sensitization of surviving  
185 *P. aeruginosa* cells to small-molecule antibiotics. This phage has been used for phage therapy  
186 as emergency treatment for chronic infections caused by antibiotic resistant *P. aeruginosa* [34],  
187 and it is currently being tested in a phase I/II clinical trial (CYPHY,  
188 <https://clinicaltrials.gov/ct2/show/NCT04684641>). With this phage, we tested whether we could  
189 insert “DNA barcodes” without impacting host range, for downstream clinical applications.  
190 Insertion of a DNA tracking signature into clinical phages would enable differentiation from  
191 naturally occurring phages during the manufacturing process and following administration to  
192 patients.

193 Two engineered OMKO1 strains were generated, one with *acrVIA1* and a 120-nt barcode  
194 inserted downstream of the capsid gene, and another with *acrVIA1* integrated upstream of the  
195 shell gene (Figure 5A, Table 1). The presence of the desired inserts were confirmed with whole  
196 genome sequencing of both OMKO1 engineered strains, and no unintended genetic changes  
197 occurred. Moreover, both strains exhibited strong resistance to Cas13a targeting (Figure 5B),  
198 owing to the expression of *acrVIA1* from the phage genomes. The host range and virulence of  
199 the two engineered OMKO1 variants together with the parental phage was then assessed on 22  
200 *P. aeruginosa* clinical strains (including PAO1). The experiment was performed in a microplate  
201 liquid assay, where phage variants were individually mixed with each host strain at a MOI~1 and  
202 MOI~0.01. All three phages displayed the same host range (Figure 5C, S5), capable of infecting  
203 and suppressing growth of 20/22 (91%) clinical strains tested. Infections at high MOI (MOI = 1)  
204 resulted in a broader host range and greater bacterial growth suppression, while low MOI (MOI =  
205 0.01) infections were able to suppress cell growth of 12/22 (55%) hosts. All phages exhibited  
206 similar virulence across all hosts with small differences in 5/22 strains. In 2/22 hosts (FB-89 and  
207 FB-92), both engineered OMKO1 strains displayed significantly higher liquid assay scores than  
208 the parental phage ( $p < 0.05$ ). While mutant OMKO1::Acr-BC had weaker virulence than the  
209 parental phage in 3/22 strains. Altogether, these results indicate that OMKO1’s host range was  
210 not affected, and virulence was impacted only modestly by inserting *acrVIA1* or *acrVIA1* and a  
211 barcode in the two selected genome locations under the tested conditions.

## 212 Application of CRISPR-Cas13a phage engineering to a small lytic Podophage

213 To evaluate the applicability of the CRISPR-Cas13a-mediated genome editing approach  
214 to other virulent phages, we selected *P. aeruginosa* phage PaMx41. PaMx41 is a Podophage  
215 isolated from environmental and sewage water samples in Central Mexico [35]. Its genome is  
216 approximately 43.5 kbp long and harbors 55 open reading frames (ORFs), ~70% of which have  
217 unknown function [36]. Remarkably, we discovered that PaMx41 appears to be resistant to many  
218 DNA-targeting CRISPR-Cas systems (Type I-C, II-A, and V-A) and showed partial sensitivity  
219 (~10-fold reduction in efficiency of plating) to Type I-F to a degree that is not sufficient for counter  
220 selection (Figure 6A). In contrast, when the transcripts of the major capsid gene (*orf11*) were  
221 targeted by CRISPR-Cas13a, PaMx41 exhibited strong sensitivities to specific crRNAs (Figure  
222 6B). Following the same approach as we developed to engineer  $\Phi$ KZ, we successfully replaced  
223 one hypothetical gene (*orf24*) and its downstream non-coding region with *acrVIA1* and isolated a  
224 pure mutant strain using an efficient gRNA (#5) (Figure 6B, Table 1). The mutant showed  
225 expected anti-CRISPR activities against different *orf11*-targeting crRNAs, indicating that the  
226 incorporated *acrVIA1* was expressed and properly functioning (Figure 6C). No other obvious  
227 phenotype was observed for the PaMx41 $\Delta$ *orf24* phage. Notably, initial PCR screening for  
228 recombinant plaques showed that 100% of surviving phages were desired recombinants, with no  
229 spontaneous escaper plaques. The data suggest that the RNA-targeting Cas13a system holds  
230 great promise for becoming a universal genetic editing tool to deal with previously intractable  
231 phages.

## 232 Discussion

233 We exploited the RNA-targeting CRISPR-Cas13a system in conjunction with homologous  
234 recombination to achieve genetic modification of jumbo phage  $\Phi$ KZ, OMKO1, and phage PaMx41  
235 that all resist DNA-targeting CRISPR-Cas systems. CRISPR-Cas13a-mediated counter-selection  
236 recovered rare (~10<sup>-5</sup>) phage recombinants from a large pool of wild-type phages. Many studies  
237 have uncovered that phages can hamper CRISPR-Cas activities, for example, by repressing  
238 transcription of endogenous CRISPR-Cas components [37, 38], possessing covalent DNA  
239 modifications [39-42], or encoding anti-CRISPR proteins (recently reviewed in [43]). Furthermore,  
240 the assembly of a proteinaceous nucleus-like structure that shields phage genomes from attack  
241 by distinct DNA-targeting nucleases [20, 21] represents the ultimate “anti-CRISPR/anti-RM”  
242 mechanism. Therefore, development of a phage genomic manipulation approaches that target a  
243 relatively constant and exposed molecule, mRNA, may provide a near-universal approach.  
244 Moreover, Cas13 is rarely encoded in bacteria and thus most phages are not expected to encode  
245 anti-Cas13a proteins.

246 Applying gene editing to this phage allowed us to query endogenous gene function and  
247 essentiality for the first time. We observed that  $\Delta$ *phuZ* mutant phages mispositioned the phage  
248 nucleus during viral intracellular development. Previous studies revealed that newly assembled  
249 phage capsids trafficked along PhuZ filaments towards the phage nucleus for viral DNA  
250 packaging [29]. However, our work suggests that successful DNA loading into capsids is not  
251 dependent on PhuZ. Moreover, loss of PhuZ appeared not to affect burst size, in contrast with a  
252 previous report using over-expression of a catalytic mutant and microscopy to estimate burst size  
253 [30]. Overall, *phuZ* seems to be a *bona fide* nonessential gene for  $\Phi$ KZ. The evolutionary  
254 advantage of encoding tubulin in this jumbo phage and many others requires further investigation.  
255 Furthermore, a chromosomal fluorescent label on gp93 demonstrated that it is packaged in the  
256 phage head, injected with the genome, and massively synthesized later in infection, with peri-

257 nuclear localization. The labeling not only allows us to visualize individual virions under the  
258 microscope, but also to observe the injection of this inner body protein into the host cell, which  
259 had been previously suggested with little evidence [33, 44].

260 One major challenge of using Cas13a in our experience has been the wide variability of  
261 crRNA efficacy. Future studies focusing on the optimization of crRNA design for phage targeting  
262 or perhaps the implementation of other RNA-targeting enzymes, such as Cas13 orthologues or  
263 Cas7-11 [45, 46] will be important. However, we circumvent this problem by implementing an anti-  
264 CRISPR selectable marker [17] to ensure that the same strong guide can be used for all genetic  
265 manipulations. The downside is that this limits the user to a single perturbation, however, double  
266 and triple mutants are possible in principle if one uses crRNAs specific to the site of editing or  
267 removes the *acr* gene from the genome.

268 Altogether, the RNA-targeting CRISPR-Cas13a counter-selection tool should be  
269 applicable to a broad range of phages and enable downstream high throughput phage  
270 engineering. The ability to precisely and efficiently generate synthetic phages with desired  
271 features will not only benefit phage therapeutic applications but also advance our understanding  
272 of fundamental phage biology and phage-bacteria interactions.

273

## 274 **Acknowledgements**

275 J.B.-D. was supported by the National Institutes of Health (R01GM127489), the Vallee  
276 Foundation, the Searle Scholarship, the Innovative Genomics Institute, and the UCSF Program  
277 for Breakthrough Biomedical Research funded in part by the Sandler Foundation. This work was  
278 also supported by research funds from Felix Biotechnology.

279 We are grateful to Luciano Marraffini (The Rockefeller University) for providing the plasmid  
280 pAM383. We thank Paul Turner (Yale University) for providing phage OMKO1 and *P. aeruginosa*  
281 clinical isolates. We thank Gabriel Guarneros Peña at Centro de Investigación y de Estudios  
282 Avanzados for providing phage PaMx41. We thank Tomer Rotstein for his generous assistance  
283 with NGS data processing and interpretation. We thank members of the Bondy-Denomy  
284 laboratory for productive conversations and generous suggestions for our work.

285

## 286 **Declaration of interests**

287 J.B.-D. is a scientific advisory board member of SNIPR Biome, Excision Biotherapeutics, and  
288 Leapfrog Bio, and a scientific advisory board member and co-founder of Acrigen Biosciences.  
289 The Bondy-Denomy lab receives research support from Felix Biotechnology.



## 290 **Materials and methods**

### 291 Strains, DNA oligonucleotides and plasmid constructions

292 All bacterial and phage strains, spacer sequences, and primers used in this study are  
293 listed in Tables S1, S2, and S3, respectively.

294 The crRNAs designed for CRISPR-Cas13 targeting were constructed in the pHERD30T  
295 backbone. The pHERD30T-crRNA Version 2 was constructed by thermal annealing of  
296 oligonucleotides oSDM465 and oSDM466 and phosphorylation by polynucleotide kinase (PNK).  
297 The annealed product was introduced by Gibson assembly into pHERD30T linearized by PCR  
298 using oligonucleotides oSDM457 and oSDM458. Proper construction of the expression vector  
299 was verified by Sanger sequencing. The pHERD30T-crRNA Version 3 was constructed just as  
300 for Version 2, but the crRNA-coding insert was instead composed of oligonucleotides oSDM455  
301 and oSDM456. Both Version 2 and Version 3 of this plasmid were designed such that cleavage  
302 by BsaI would generate a linear plasmid that would accept annealed oligonucleotide spacers via  
303 ligation. Oligonucleotide pairs with repeat-specific overhangs encoding spacer sequences were  
304 annealed and phosphorylated using T4 polynucleotide kinase and then cloned into the BsaI-  
305 digested empty vectors. Cloning procedures were performed in commercial *E. coli* DH5 $\alpha$  cells  
306 (New England Biolabs) according to the manufacturer's protocols. The resulting crRNA plasmids  
307 were electroporated into *P. aeruginosa* PAO1 strain harboring the *tn7::cas13a<sup>Lse</sup>* (SDM084) on  
308 the chromosome as described previously [20]. Gene expression was induced by the addition of  
309 L-arabinose at a final concentration of 0.3% and isopropyl  $\beta$ -D-1-thiogalactopyranoside (IPTG) at  
310 a final concentration of 1 mM.

311 To construct template plasmids for homologous recombination, homology arms of >500  
312 bp in length were amplified by PCR using the  $\Phi$ KZ genomic DNA as the template. To prevent  
313 Cas13a cleavage, several synonymous mutations were introduced into the crRNA-targeting site  
314 of the left *orf120* homology arm by designing the reverse primer (JG064) to contain appropriate  
315 mismatches. The *acrVIA1* gene was amplified from plasmid pAM383 [24], a gift from Luciano  
316 Marraffini, The Rockefeller University. PCR products were purified and assembled as a  
317 recombineering substrate and then inserted into the NheI site of the pHERD30T backbone by  
318 Gibson Assembly (New England Biolabs) following the manufacturer's protocols. The resulting  
319 plasmids were transformed into PAO1 by electroporation.

### 320 Isolation of phage recombinants

321 Host strains bearing recombination plasmids were grown in LB supplemented with 10 mM  
322 MgSO<sub>4</sub> and 50  $\mu$ g/ml gentamicin, at 37°C with aeration at 250 rpm. When OD<sub>600</sub> is around 2, Wild  
323 type  $\Phi$ KZ was added into the culture at a MOI (multiplicity of infection) of 1 to allow infection to  
324 occur for ~18 hours. 2% volume of chloroform was added into the infection culture and left to  
325 shake gently on an orbital shaker at room temperature for 15 min, followed by centrifugation at  
326 4,000 x g for 15 min to remove cell debris. The supernatant lysate was further treated with 2% of  
327 chloroform for 15 min and centrifuged again under the same conditions, followed by a 30-min  
328 treatment with DNase I (New England Biolabs) at 37°C. The resulting phage lysate containing  
329 both WT phages and recombinants are titered on PAO1 strains bearing the CRISPR-Cas13a  
330 system with the most efficient crRNA (*orf120* guide#2) to screen for recombinants. Individual  
331 phage plaques were picked from top agar and purified for three rounds using the CRISPR counter-  
332 selection strain to ensure thorough removal of any remaining WT or escapers. Whether or not  
333 they are recombinant phages or Cas13a escaper phages were determined by PCR using

334 appropriate pairs of primers amplifying the modified regions of the phage genome. Identified  
335 phages were further confirmed and analyzed by sequencing the PCR products or the whole  
336 genomes and then stored at 4°C.

### 337 Phage plaque assay

338 Host strains were grown in LBM (LB supplemented with 10 mM MgSO<sub>4</sub>), 50 µg/ml  
339 gentamicin, 1 mM IPTG and 0.3% arabinose inducers for gene expression, at 37°C with aeration  
340 at 250 rpm for overnight. Phage spotting assays were performed using 1.5% LB agar plates and  
341 0.42% LB top agar, both of which contained 10 mM MgSO<sub>4</sub> and inducers. 100 µl of appropriate  
342 overnight culture was suspended in 3.5 ml of molten top agar and then poured onto an LB+10 mM  
343 MgSO<sub>4</sub> agar plate, leading to the growth of a bacterial lawn. After 10-15 min at room temperature,  
344 2 µl of ten-fold serial dilutions of phages was spotted onto the solidified top agar. Plates were  
345 incubated overnight at 37°C. Plate images were obtained using Gel Doc EZ Gel Documentation  
346 System (BioRad) and Image Lab (BioRad) software.

### 347 Microplate Liquid Assay

348 Fresh overnight cultures were diluted to a cell concentration of 1×10<sup>8</sup> cfu/ml in TSB media  
349 supplemented with 10mM MgSO<sub>4</sub>. Phage lysates were added to reach a MOI of ~1 and ~0.01 in  
350 a Corning Costar 96-well clear flat-bottom microplate (Thermo Fisher Scientific) sealed with a  
351 Breathe-Easy® sealing membrane (Merck KGaA). After the infection cultures were incubated at  
352 room temperature for 20 min, plates were incubated at 37°C, 800 rpm for 8 hours in a BioTek  
353 LogPhase 600 plate reader (Agilent Technologies, Inc.). Cell growth was monitored by measuring  
354 OD<sub>600</sub> every 20 min. Each phage-host combination was performed in three biological replicates.

### 355 Data Analysis

356 Growth curves for each phage-host combination were obtained by plotting OD<sub>600</sub> after  
357 blank correction (baseline adjustment) against time. Each growth curve was transformed into a  
358 single numerical value by calculating the area under the curve (AUC) using the Trapezoid method.  
359 Then, AUCs were normalized as a percentage of the AUC of their corresponding uninfected  
360 control following the equation,

$$361 \quad \text{Liquid assay score} = \frac{AUC(\text{positive control}) - AUC(\text{phage treatment})}{AUC(\text{positive control})} \times 100$$

362 The resulting value, defined as the “liquid assay score”, represents how well the phage  
363 strain can repress the growth of a bacterial population over the course of the 8-hour experiment.  
364 No inhibition of bacterial growth would result in a liquid assay score of 0, and complete  
365 suppression would translate into a score of 100. Liquid assay scores were averaged using data  
366 from three biological replicates.

### 367 Burst size measurement

368 Phage burst size was determined by one-step growth curve experiments. Briefly, the host  
369 PAO1 strain was grown in LB media to OD<sub>600</sub> ~0.4. 1 ml of the cell culture was then centrifuged  
370 at 4,000 × g for 2 min and the cell pellet was resuspended in 50 µl of fresh LBM. Appropriate  
371 amount of phages was mixed with the cell culture to achieve an MOI of 0.01 to limit to single  
372 infections. The mixture was incubated on ice for 20 min for phage adsorption and transferred to  
373 a 37°C heat block for 10 min to trigger phage DNA injection. The infection mixture was centrifuged

374 at 10,000 × g for 2 min. Transfer 10 µl of the supernatant into 990 µl of ice-cold SM buffer supplied  
375 with 2% chloroform. Titer to calculate the number of free phages. After discarding the supernatant  
376 to remove free phage particles, the pellet was resuspended in 1 ml of LBM, followed by incubation  
377 at 37°C with shaking at 250 rpm. Samples were collected at 10-min intervals until 90 min, and  
378 phage titer was determined immediately. Phage burst sizes were calculated by dividing the phage  
379 titers at ~50 min by the initial phage titers after subtracting free phages.

#### 380 Single-cell infection assay

381 1 ml of host cells was grown in LBM (LB supplemented with 10 mM MgSO<sub>4</sub>) and 50 µg/ml  
382 gentamicin (if necessary), at 37°C with aeration at 250 rpm for overnight. The overnight culture  
383 was diluted 1:100 into 5 ml of LBM and grown at 37°C with 250 rpm shaking until OD<sub>600</sub> ~0.4.  
384 Next, 1 ml of cell culture was collected by centrifugation at 3,000 × g for 2 min at room temperature  
385 and concentrated by 25-fold in fresh LBM. 10 µl of cells were then mixed with 10 µl of appropriate  
386 phage strains to reach an appropriate MOI, followed by incubation at 30°C for 10 min to allow for  
387 phage infection. The infection mixture was further diluted by 10-fold into 50 µl of fresh LBM at  
388 room temperature. 1 µl of the diluted culture was gently placed onto a piece of agarose pad (~1  
389 mm thick) with 1:5 diluted LBM, arabinose (0.8%), and DAPI (5 µg/ml; Invitrogen&#153, No.  
390 D1306). A coverslip (No.1.5, Fisher Scientific) was gently laid over the agarose pad and the  
391 sample was imaged under the fluorescence microscope at 30°C within a cage incubator to  
392 maintain temperature and humidity.

#### 393 Fluorescence microscopy and imaging

394 Microscopy was performed on an inverted epifluorescence (Ti2-E, Nikon, Tokyo, Japan)  
395 equipped with the Perfect Focus System (PFS) and a Photometrics Prime 95B 25-mm camera.  
396 Image acquisition and processing were performed using Nikon Elements AR software. During a  
397 time-lapse movie, the specimen was typically imaged at a time interval of 5 min at the focal plane  
398 for 2.5~3 h, through channels of phase contrast (200 ms exposure, for cell recognition), blue  
399 (DAPI, 200 ms exposure, for phage DNA), and green (GFP, 300 ms exposure, for Gp93-  
400 mNeonGreen).

#### 401 Next-generation sequencing (NGS)

402 To isolate phage genomic DNA, purified high titer lysates were treated with Benzonase  
403 Nuclease (Sigma) for 30 min at 37°C. Phage genomic DNA was extracted with a modified Wizard  
404 DNA Clean-Up kit (Promega) protocol. DNA samples were quantified with AccuGreen Broad  
405 Range dsDNA quantification kit (Biotium, USA) in a Qubit Fluorometer 2.0.

406 Purified phage genomic DNA was processed following Illumina DNA Preparation Protocol.  
407 Samples were sequenced on a MiSeq system (Illumina) with 300 cycles of paired-end sequencing,  
408 and loading concentration of 12 pM. Illumina short reads were downsampled to ~50-100×  
409 coverage and de novo assembled using SPAdes. The sequences of mutant phage strains were  
410 aligned to the reference genome in Geneious with the Mauve alignment algorithm to confirm the  
411 intended genomic edits.

412 The isolated *orf54* “pseudo knock-out” phage strain (“*orf54*”) was sequenced using long-  
413 read sequencing. DNA samples were processed using SQK-LSK109 kit (Oxford Nanopore  
414 Technologies, UK). Libraries were sequenced using an R10.3 flow cell until the desired number

415 of reads was achieved. Oxford Nanopore long reads were filtered for the longest high quality  
416 reads using Nanofilt and de novo assembled using Flye.

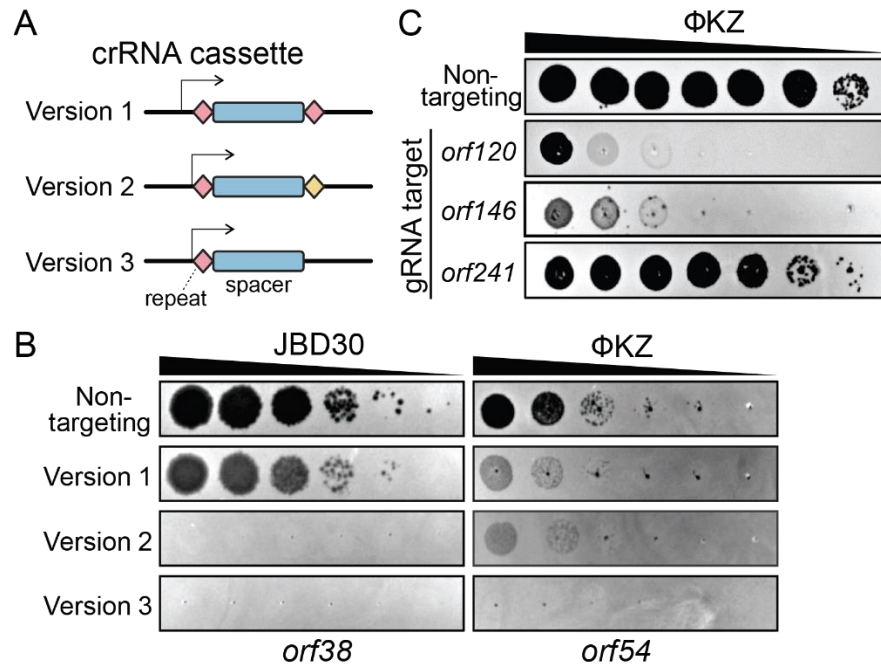

417

418

419 **Figure 1. Optimization of CRISPR-Cas13a crRNA expression vector for efficient phage**  
420 **interference.**

421 (A) Schematic of three versions of CRISPR-Cas13a crRNA cassette (B) Efficiency of plaquing of  
422 three versions of crRNA cassette targeting two unrelated phage strains: JBD30 and  $\Phi$ KZ. Wild-  
423 type phages were spotted in ten-fold serial dilutions (left to right) on a lawn of *P. aeruginosa* PAO1  
424 expressing *LseCas13a* from the chromosome and harboring indicated crRNA expression vectors.  
425 The cassettes carried the same spacer sequences targeting transcripts of *orf38* of JBD30 and  
426 *orf54* of  $\Phi$ KZ, respectively. (C) Cas13a interference efficiency of distinct crRNAs against  $\Phi$ KZ  
427 using Version 3 crRNA expression vector. The most efficient crRNA that targets the *orf120*  
428 transcript was selected for genetic engineering of  $\Phi$ KZ. All plaque assays were replicated three  
429 times yielding similar results.



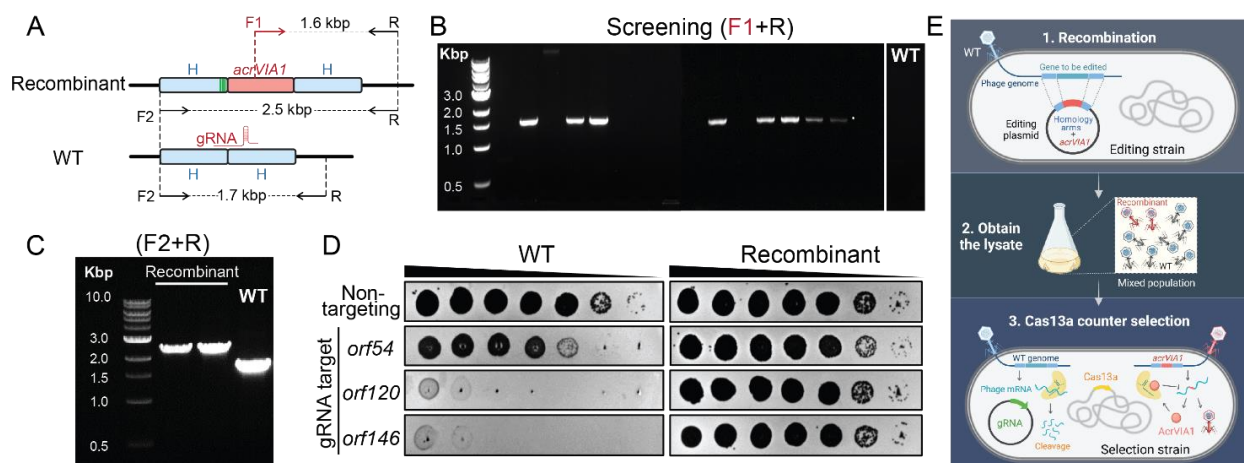

430

431

432 **Figure 2. Screening for  $\Phi$ KZ recombinants by CRISPR-Cas13a counter selection.**

433 (A) Schematic of WT  $\Phi$ KZ and recombinant genomes at the editing site. The *acrVIA1* gene,  
 434 shown as a red rectangle, was inserted downstream of *orf120*, with up- and downstream of  
 435 homology arms (H) indicated by blue rectangles. Green stripes represent synonymous mutations  
 436 that were introduced to the homology region to prevent crRNA targeting for recombinant phages.  
 437 F and R indicate forward and reverse primers, respectively, being used to confirm the insertion of  
 438 *acrVIA1*. (B) Recombinant phages were screened by PCR using primer F1 and R. (C)  
 439 Recombinant phage plaques underwent 3 rounds of purification and were further confirmed by  
 440 PCR using primer F2 and R. (D) Plaque assays showing robust anti-CRISPR activities acquired  
 441 by recombinant  $\Phi$ KZ against distinct crRNAs, owing to the successful expression and execution  
 442 of the incorporated AcrVIA1. (E) Workflow of phage genome engineering using CRISPR-Cas13a.  
 443 The strategy can be divided into three steps. In the first step, an editing plasmid is constructed  
 444 to introduce desired genetic modifications, such as insertion, deletion, and tag-fusion, and *acrVIA1*  
 445 flanked by up- and downstream homology arms matching the phage genome. This plasmid is  
 446 transformed into a bacterial host strain, referred to as the editing strain, followed by infection by  
 447 wild-type phages. In the second step, the infection culture is harvested, yielding a mixed phage  
 448 lysate, containing WT phages, recombinants, and escaper mutants. In the last step, the lysate is  
 449 plated on the selection strain harboring Cas13a on the bacterial chromosome and the most  
 450 effective gRNA targeting WT phages. Recombinants and escaper mutants will be recovered to  
 451 form visible plaques on the cell lawn, while WT phages are eliminated by CRISPR-Cas13a via  
 452 cleavage of targeted phage mRNA. Recombinants are screened by PCR using appropriate  
 453 primers and further confirmed by sequencing. Remarkably, AcrVIA1 produced by recombinant  
 454 phages enables ineffectiveness of Cas13a regardless of any gRNA. Accordingly, the same guide  
 455 can be used for any genomic manipulation of the same phage strain, greatly reducing the effort  
 456 on seeking for efficient gRNAs to edit distinct genomic loci.

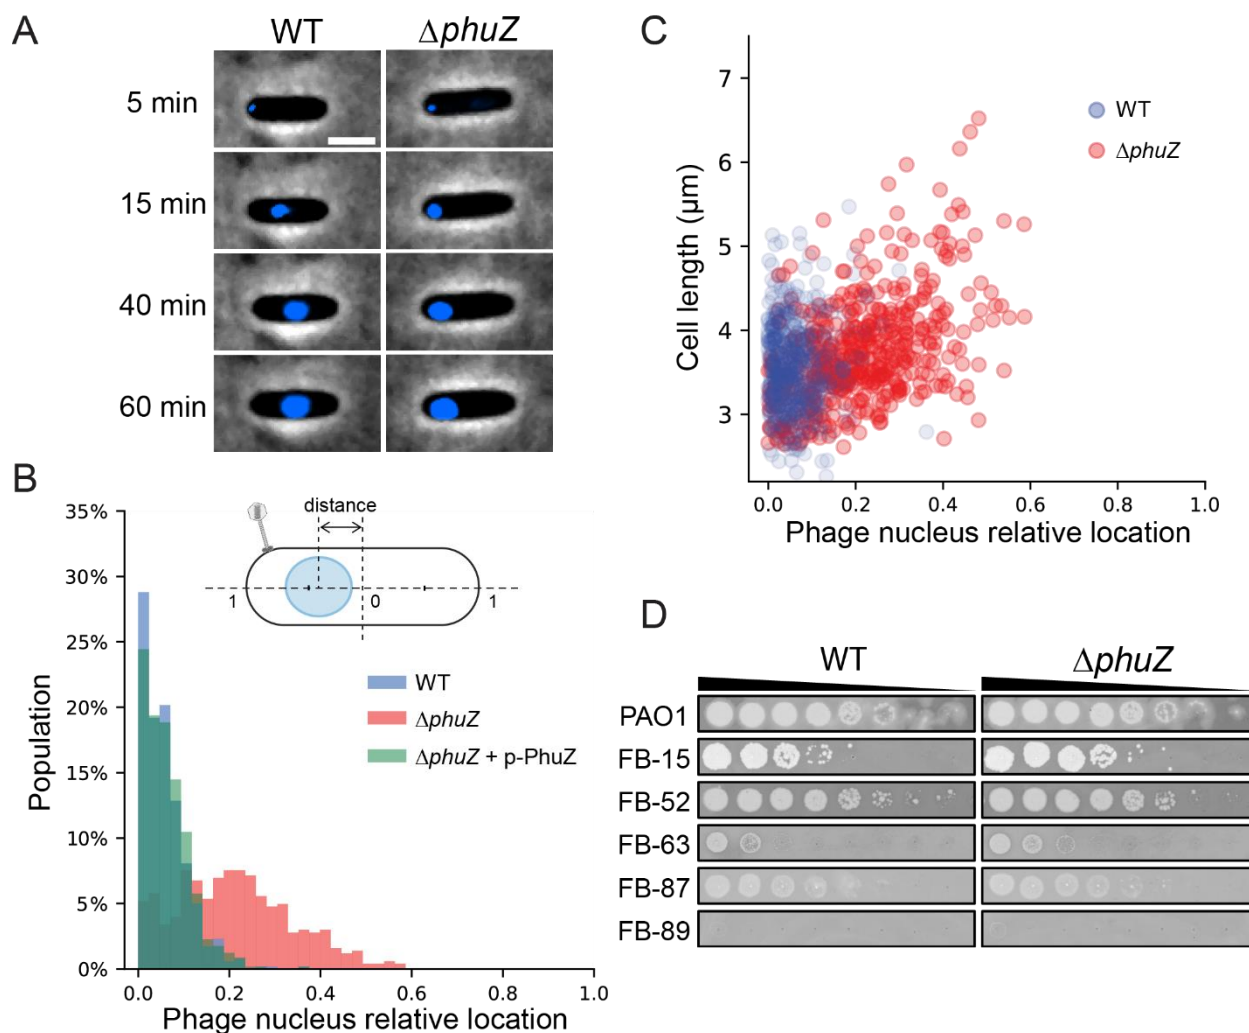

457

458

459 **Figure 3. Absence of PhuZ causes mispositioning of the phage nucleus.**

460 (A) Left: a representative cell infected by WT  $\Phi\text{KZ}$ . Right: a representative cell infected by  $\Delta phuZ$   
 461 mutant. Phage DNA is stained by DAPI and shown as blue signals. The phage nucleus is  
 462 mispositioned near the cell polar region upon infection by  $\Delta phuZ$ , in contrast to the WT infection  
 463 where the phage nucleus is centered. Scale bar denotes 2  $\mu\text{m}$ . (B) Distribution of subcellular  
 464 location of the phage nucleus in PAO1 cells infected by WT (blue, N = 521) and  $\Delta phuZ$  (red, N =  
 465 503), and a PAO1 strain expressing wild-type PhuZ *in trans* (p-PhuZ) and infected by  $\Delta phuZ$  (light  
 466 green, N = 573). The diagram of an infected cell is shown on the top. The phage nucleus  
 467 location is defined as the relative distance between the cell center and the nucleus center. (C) The  
 468 phage nucleus location is plotted against the cell length for WT and  $\Delta phuZ$ . The phage nucleus  
 469 position in  $\Delta phuZ$ -infected cells positively correlates with the cell length with a *Pearson*  
 470 correlation coefficient of 0.486,  $p < 0.001$ , whereas there is no such correlation for WT infection  
 471 with a *Pearson* correlation coefficient of 0.029,  $p = 0.505$ . (D) Efficiency of plaquing of WT and  $\Delta phuZ$   
 472 on representative *P. aeruginosa* clinical strains. (The full panel of plaque assays is presented in  
 473 Figure S3)

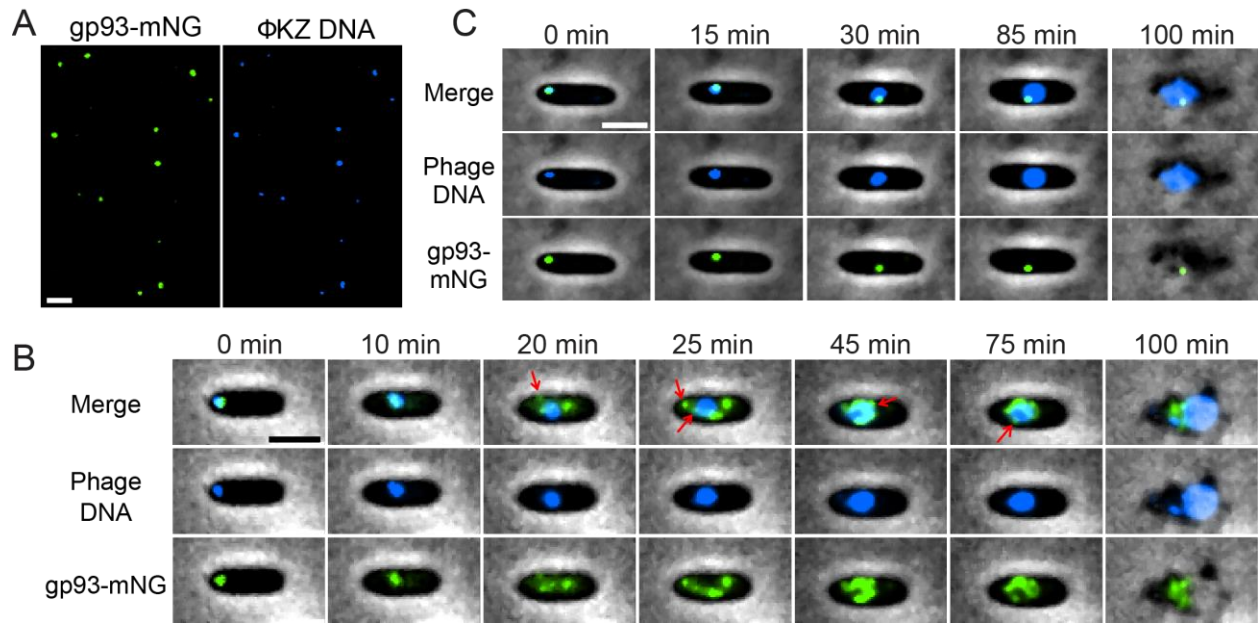

474

475

476

#### Figure 4. Chromosomal fluorescent labeling of an inner body protein of ΦKZ.

477

478

479

480

481

482

483

484

485

486

487

488

489

(A) Visualization of individual phage particles under the fluorescence microscope. *orf39* encoding one of the major components of ΦKZ inner body is genetically fused to mNeonGreen. Each mutant phage particle is visible as a green focus (left), due to the packaging of gp93-mNeonGreen in the capsid. ΦKZ genomic DNA is labeled by DAPI (right). mNeonGreen and DAPI signals colocalize very well and individual virions are easily distinguishable. (B) Overlay images (phase-contrast and fluorescent channels) from a time-lapse movie depicting a representative PAO1 cell being infected by a gp93-mNeonGreen mutant phage. gp93-mNeonGreen and phage DNA are shown as green and blue signals, respectively. Red arrows point to newly assembled phage capsids, both originated on the cell inner membrane (20 min) and anchored on the phage nucleus surface for subsequent phage DNA packaging (25, 45, and 75 min). (C) Overlay images from a time-lapse movie showing a PAO1 cell being infected by a WT ΦKZ loaded with gp93-mNeonGreen fusions. Packaged gp93-mNeonGreen appears as a green focus and remains bound to phage DNA throughout the infection cycle. Scale bar denotes 2 μm.

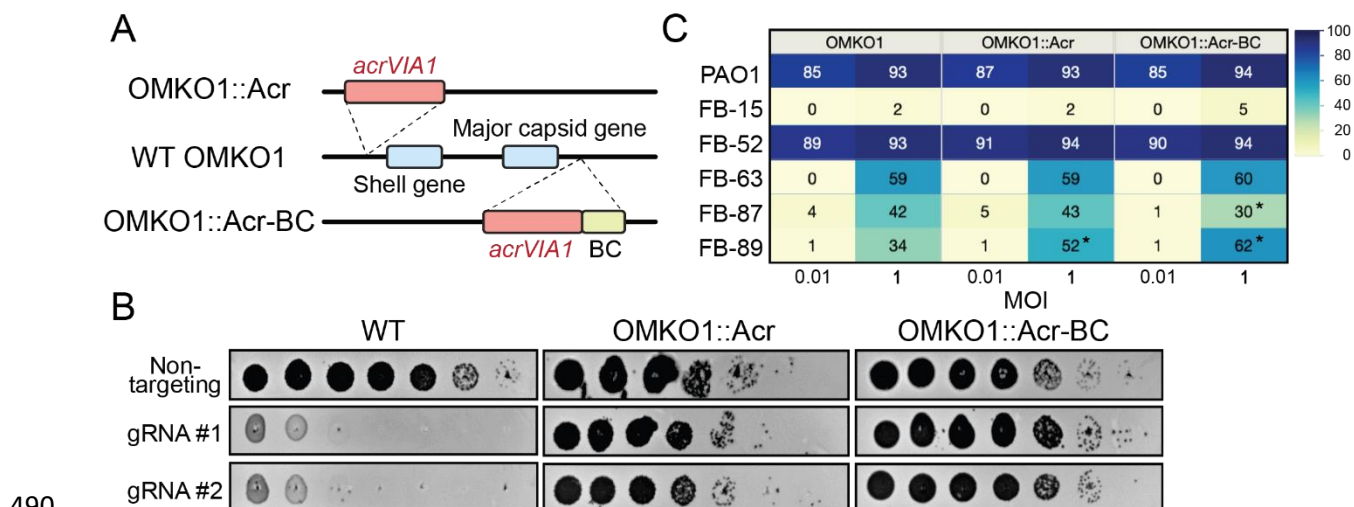

490

491

492 **Figure 5. Genetic engineering of therapeutic jumbo phage OMKO1.**

493 (A) Schematic of genomes of two engineered OMKO1 variants where indicated gene fragments  
 494 are integrated into the WT genome. OMKO1::Acr, *acrVIA1* is inserted upstream of the shell gene.  
 495 OMKO1::Acr-BC, *acrVIA1* is inserted together with a barcode sequence (BC) downstream of the  
 496 major capsid gene. (B) Plaque assays of WT OMKO1 and mutants. Both engineered variants  
 497 exhibit robust resistance against distinct CRISPR-Cas13a crRNAs, suggesting that the  
 498 incorporated AcrVIA1 is successfully functioning. (C) Determination of host range of WT OMKO1  
 499 and mutants on representative *P. aeruginosa* clinical strains by microplate liquid assay at MOI of  
 500 0.01 and 1. Data are presented as the mean liquid assay scores across three independent  
 501 experiments. Asterisks (\*) indicate significant difference between WT and mutants as determined  
 502 by Students' T-test ( $p < 0.05$ ). The color intensity of each phage-host combination reflects the  
 503 liquid assay score, with the darker color the stronger intensity displaying a greater score. (The full  
 504 table of plaque assays is shown in Figure S5)

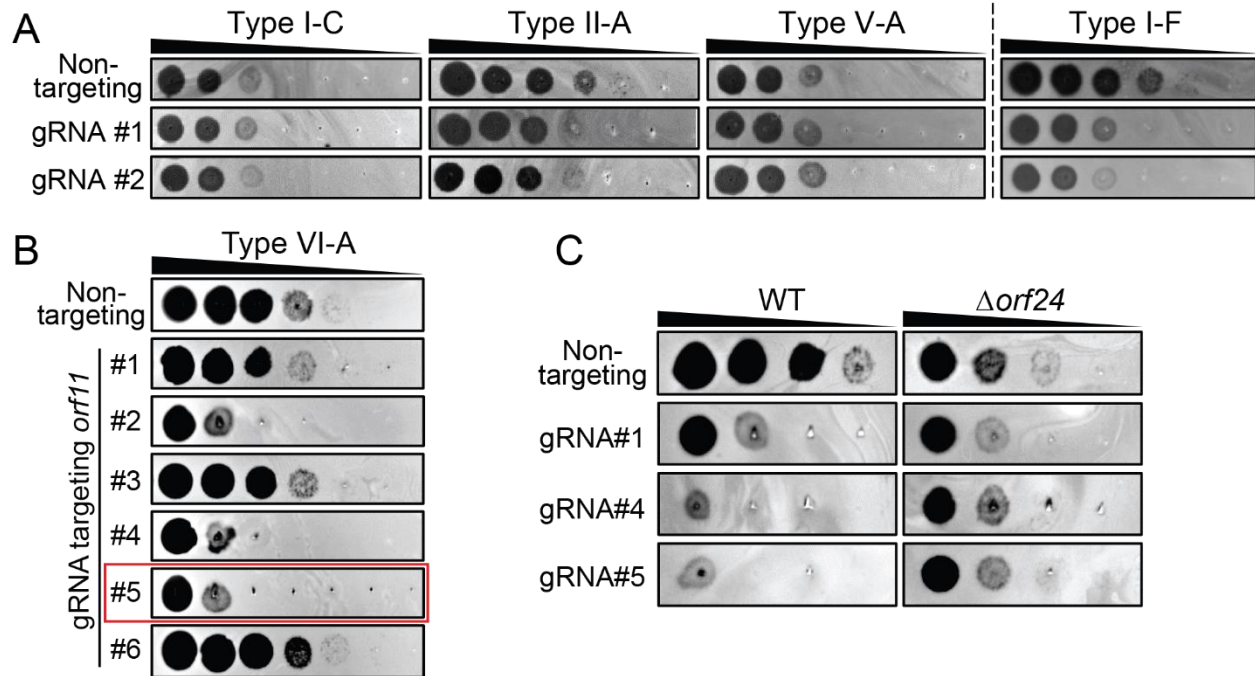

505

506

507 **Figure 6. Genetic engineering of Podophage PaMx41.**

508 (A) Plaque assays showing PaMx41 resistance to a broad variety of DNA-targeting CRISPR-Cas  
509 systems. (B) PaMx41 exhibits significant sensitivity to CRISPR-Cas13a. gRNA#5 highlighted in  
510 the red frame has been used for PaMx41 genome engineering. (C) PaMx41  $\Delta orf24$  mutant strain  
511 is resistant to diverse crRNAs of CRISPR-Cas13a, due to the expression of AcrVIA1 from the  
512 phage genome.



513 **Table 1. Summary of phage mutants engineered by CRISPR-Cas13a.**

| Phage                                    | Gene No. /Genomic site        | Identified protein | Modification             | Plaque# <sup>1</sup> | screening% | Isolated or not? |
|------------------------------------------|-------------------------------|--------------------|--------------------------|----------------------|------------|------------------|
| <b>ΦKZ</b>                               | Upstream of <i>orf54</i>      | -                  | Insertion                | 17                   | 41.2%      | Yes              |
|                                          | Downstream of <i>orf120</i>   | -                  | Insertion                | 16                   | 50.0%      |                  |
|                                          | <i>orf39</i>                  | PhuZ               | Deletion                 | 17                   | 52.9%      |                  |
|                                          | <i>orf93</i>                  | Inner body protein | Deletion                 | 20                   | 20.0%      |                  |
|                                          |                               |                    | gp93-mNeonGreen fusion   | 22                   | 18.2%      |                  |
|                                          | <i>orf241</i>                 | Hypothetical       | Deletion                 | 23                   | 26.1%      |                  |
|                                          | <i>orf241, orf242</i>         | Hypothetical       | Double deletions         | 12                   | 41.7%      |                  |
|                                          | <i>orf54</i>                  | Shell              | Deletion                 | 15                   | 20.0%      | No               |
|                                          |                               |                    | mCherry-gp54 fusion      | 24                   | 8.3%       |                  |
|                                          |                               |                    | gp54-mCherry fusion      | 11                   | 9.1%       |                  |
| gfp11-gp54 fusion                        |                               |                    | 57                       | 7.0%                 |            |                  |
| <i>orf89, orf90, orf91, orf92, orf93</i> | Head structural proteins      | Multiple deletions | 17                       | 11.8%                |            |                  |
| <i>orf146</i>                            | Structural protein            | Deletion           | 86                       | 0.0%                 |            |                  |
| <b>OMKO1</b>                             | Downstream of the capsid gene | -                  | Insertion with a barcode | 24                   | 70.8%      | Yes              |
|                                          | Upstream of the shell gene    | -                  | Insertion                | 12                   | 50.0%      |                  |
| <b>PaMx41</b>                            | <i>orf24</i>                  | Hypothetical       | Deletion                 | 8                    | 100.0%     | Yes              |

514

515 <sup>1</sup>Number of plaques analyzed by PCR to screen for recombinants.

## 516 References

- 517 1. Kortright, K.E., Chan, B.K., Koff, J.L., and Turner, P.E. (2019). Phage Therapy: A  
518 Renewed Approach to Combat Antibiotic-Resistant Bacteria. *Cell Host Microbe* 25, 219-  
519 232.
- 520 2. Pires, D.P., Cleto, S., Sillankorva, S., Azeredo, J., and Lu, T.K. (2016). Genetically  
521 Engineered Phages: a Review of Advances over the Last Decade. *Microbiol Mol Biol Rev*  
522 80, 523-543.
- 523 3. Doss, J., Culbertson, K., Hahn, D., Camacho, J., and Berekzi, N. (2017). A Review of  
524 Phage Therapy against Bacterial Pathogens of Aquatic and Terrestrial Organisms.  
525 *Viruses* 9.
- 526 4. Nobrega, F.L., Costa, A.R., Kluskens, L.D., and Azeredo, J. (2015). Revisiting phage  
527 therapy: new applications for old resources. *Trends Microbiol* 23, 185-191.
- 528 5. Lusiak-Szelachowska, M., Zaczek, M., Weber-Dabrowska, B., Miedzybrodzki, R., Klak, M.,  
529 Fortuna, W., Letkiewicz, S., Rogoz, P., Szufnarowski, K., Jonczyk-Matysiak, E., et al.  
530 (2014). Phage Neutralization by Sera of Patients Receiving Phage Therapy. *Viral Immunol*  
531 27, 295-304.
- 532 6. Weber-Dabrowska, B., Jonczyk-Matysiak, E., Zaczek, M., Lobočka, M., Lusiak-  
533 Szelachowska, M., and Gorski, A. (2016). Bacteriophage Procurement for Therapeutic  
534 Purposes. *Front Microbiol* 7, 1177.
- 535 7. Lu, T.K., and Koeris, M.S. (2011). The next generation of bacteriophage therapy. *Curr*  
536 *Opin Microbiol* 14, 524-531.
- 537 8. Lenneman, B.R., Fernbach, J., Loessner, M.J., Lu, T.K., and Kilcher, S. (2020). Enhancing  
538 phage therapy through synthetic biology and genome engineering. *Curr Opin Biotechnol*  
539 68, 151-159.
- 540 9. Ando, H., Lemire, S., Pires, D.P., and Lu, T.K. (2015). Engineering Modular Viral Scaffolds  
541 for Targeted Bacterial Population Editing. *Cell Syst* 1, 187-196.
- 542 10. Mahichi, F., Synnott, A.J., Yamamichi, K., Osada, T., and Tanji, Y. (2009). Site-specific  
543 recombination of T2 phage using IP008 long tail fiber genes provides a targeted method  
544 for expanding host range while retaining lytic activity. *FEMS Microbiol Lett* 295, 211-217.
- 545 11. Matsuda, T., Freeman, T.A., Hilbert, D.W., Duff, M., Fuortes, M., Stapleton, P.P., and Daly,  
546 J.M. (2005). Lysis-deficient bacteriophage therapy decreases endotoxin and inflammatory  
547 mediator release and improves survival in a murine peritonitis model. *Surgery* 137, 639-  
548 646.
- 549 12. Monteiro, R., Pires, D.P., Costa, A.R., and Azeredo, J. (2019). Phage Therapy: Going  
550 Temperate? *Trends Microbiol* 27, 368-378.
- 551 13. Kilcher, S., and Loessner, M.J. (2019). Engineering Bacteriophages as Versatile Biologics.  
552 *Trends Microbiol* 27, 355-367.
- 553 14. Marinelli, L.J., Hatfull, G.F., and Piuri, M. (2012). Recombineering: A powerful tool for  
554 modification of bacteriophage genomes. *Bacteriophage* 2, 5-14.
- 555 15. Deveau, H., Garneau, J.E., and Moineau, S. (2010). CRISPR/Cas system and its role in  
556 phage-bacteria interactions. *Annu Rev Microbiol* 64, 475-493.
- 557 16. Hille, F., Richter, H., Wong, S.P., Bratovic, M., Ressel, S., and Charpentier, E. (2018). The  
558 Biology of CRISPR-Cas: Backward and Forward. *Cell* 172, 1239-1259.
- 559 17. Mayo-Munoz, D., He, F., Jorgensen, J.B., Madsen, P.K., Bhoobalan-Chitty, Y., and Peng,  
560 X. (2018). Anti-CRISPR-Based and CRISPR-Based Genome Editing of *Sulfolobus*  
561 *islandicus* Rod-Shaped Virus 2. *Viruses* 10.
- 562 18. Samson, J.E., Magadan, A.H., Sabri, M., and Moineau, S. (2013). Revenge of the phages:  
563 defeating bacterial defences. *Nat Rev Microbiol* 11, 675-687.
- 564 19. Malone, L.M., Birkholz, N., and Fineran, P.C. (2020). Conquering CRISPR: how phages  
565 overcome bacterial adaptive immunity. *Curr Opin Biotechnol* 68, 30-36.

- 566 20. Mendoza, S.D., Nieweglowska, E.S., Govindarajan, S., Leon, L.M., Berry, J.D., Tiwari, A.,  
567 Chaikeratisak, V., Pogliano, J., Agard, D.A., and Bondy-Denomy, J. (2020). A  
568 bacteriophage nucleus-like compartment shields DNA from CRISPR nucleases. *Nature*  
569 *577*, 244-248.
- 570 21. Malone, L.M., Warring, S.L., Jackson, S.A., Warnecke, C., Gardner, P.P., Gumy, L.F., and  
571 Fineran, P.C. (2020). A jumbo phage that forms a nucleus-like structure evades CRISPR-  
572 Cas DNA targeting but is vulnerable to type III RNA-based immunity. *Nat Microbiol* *5*, 48-  
573 55.
- 574 22. Guan, J., and Bondy-Denomy, J. (2020). Intracellular Organization by Jumbo  
575 Bacteriophages. *J Bacteriol* *203*.
- 576 23. Abudayyeh, O.O., Gootenberg, J.S., Konermann, S., Joung, J., Slaymaker, I.M., Cox, D.B.,  
577 Shmakov, S., Makarova, K.S., Semenova, E., Minakhin, L., et al. (2016). C2c2 is a single-  
578 component programmable RNA-guided RNA-targeting CRISPR effector. *Science* *353*,  
579 aaf5573.
- 580 24. Meeske, A.J., Jia, N., Cassel, A.K., Kozlova, A., Liao, J., Wiedmann, M., Patel, D.J., and  
581 Marraffini, L.A. (2020). A phage-encoded anti-CRISPR enables complete evasion of type  
582 VI-A CRISPR-Cas immunity. *Science* *369*, 54-59.
- 583 25. L, M.I., Anantharaman, V., Krishnan, A., Burroughs, A.M., and Aravind, L. (2021). Jumbo  
584 Phages: A Comparative Genomic Overview of Core Functions and Adaptions for  
585 Biological Conflicts. *Viruses* *13*.
- 586 26. Al-Shayeb, B., Sachdeva, R., Chen, L.X., Ward, F., Munk, P., Devoto, A., Castelle, C.J.,  
587 Olm, M.R., Bouma-Gregson, K., Amano, Y., et al. (2020). Clades of huge phages from  
588 across Earth's ecosystems. *Nature* *578*, 425-431.
- 589 27. Aylett, C.H., Izore, T., Amos, L.A., and Lowe, J. (2013). Structure of the tubulin/FtsZ-like  
590 protein TubZ from *Pseudomonas* bacteriophage PhiKZ. *J Mol Biol* *425*, 2164-2173.
- 591 28. Chaikeratisak, V., Nguyen, K., Egan, M.E., Erb, M.L., Vavilina, A., and Pogliano, J.  
592 (2017). The Phage Nucleus and Tubulin Spindle Are Conserved among Large  
593 *Pseudomonas* Phages. *Cell Rep* *20*, 1563-1571.
- 594 29. Chaikeratisak, V., Khanna, K., Nguyen, K.T., Sugie, J., Egan, M.E., Erb, M.L., Vavilina,  
595 A., Nonejuie, P., Nieweglowska, E., Pogliano, K., et al. (2019). Viral Capsid Trafficking  
596 along Treadmilling Tubulin Filaments in Bacteria. *Cell* *177*, 1771-1780 e1712.
- 597 30. Kraemer, J.A., Erb, M.L., Waddling, C.A., Montabana, E.A., Zehr, E.A., Wang, H., Nguyen,  
598 K., Pham, D.S., Agard, D.A., and Pogliano, J. (2012). A phage tubulin assembles dynamic  
599 filaments by an atypical mechanism to center viral DNA within the host cell. *Cell* *149*, 1488-  
600 1499.
- 601 31. Chaikeratisak, V., Nguyen, K., Khanna, K., Brilot, A.F., Erb, M.L., Coker, J.K., Vavilina,  
602 A., Newton, G.L., Buschauer, R., Pogliano, K., et al. (2017). Assembly of a nucleus-like  
603 structure during viral replication in bacteria. *Science* *355*, 194-197.
- 604 32. Wu, W., Thomas, J.A., Cheng, N., Black, L.W., and Steven, A.C. (2012). Bubblegrams  
605 reveal the inner body of bacteriophage phiKZ. *Science* *335*, 182.
- 606 33. Thomas, J.A., Weintraub, S.T., Wu, W., Winkler, D.C., Cheng, N., Steven, A.C., and Black,  
607 L.W. (2012). Extensive proteolysis of head and inner body proteins by a morphogenetic  
608 protease in the giant *Pseudomonas aeruginosa* phage phiKZ. *Mol Microbiol* *84*, 324-339.
- 609 34. Chan, B.K., Turner, P.E., Kim, S., Mojibian, H.R., Eleftheriades, J.A., and Narayan, D.  
610 (2018). Phage treatment of an aortic graft infected with *Pseudomonas aeruginosa*. *Evol*  
611 *Med Public Health* *2018*, 60-66.
- 612 35. Sepulveda-Robles, O., Kameyama, L., and Guarneros, G. (2012). High diversity and novel  
613 species of *Pseudomonas aeruginosa* bacteriophages. *Appl Environ Microbiol* *78*, 4510-  
614 4515.

- 615 36. Cruz-Plancarte, I., Cazares, A., and Guarneros, G. (2016). Genomic and Transcriptional  
616 Mapping of PaMx41, Archetype of a New Lineage of Bacteriophages Infecting  
617 *Pseudomonas aeruginosa*. *Appl Environ Microbiol* 82, 6541-6547.
- 618 37. Skennerton, C.T., Angly, F.E., Breitbart, M., Bragg, L., He, S., McMahon, K.D., Hugenholz,  
619 P., and Tyson, G.W. (2011). Phage encoded H-NS: a potential achilles heel in the bacterial  
620 defence system. *PLoS One* 6, e20095.
- 621 38. Pul, U., Wurm, R., Arslan, Z., Geissen, R., Hofmann, N., and Wagner, R. (2010).  
622 Identification and characterization of *E. coli* CRISPR-cas promoters and their silencing by  
623 H-NS. *Mol Microbiol* 75, 1495-1512.
- 624 39. Hampton, H.G., Watson, B.N.J., and Fineran, P.C. (2020). The arms race between  
625 bacteria and their phage foes. *Nature* 577, 327-336.
- 626 40. Vlot, M., Houkes, J., Lochs, S.J.A., Swarts, D.C., Zheng, P., Kunne, T., Mohanraju, P.,  
627 Anders, C., Jinek, M., van der Oost, J., et al. (2018). Bacteriophage DNA glucosylation  
628 impairs target DNA binding by type I and II but not by type V CRISPR-Cas effector  
629 complexes. *Nucleic Acids Res* 46, 873-885.
- 630 41. Bryson, A.L., Hwang, Y., Sherrill-Mix, S., Wu, G.D., Lewis, J.D., Black, L., Clark, T.A., and  
631 Bushman, F.D. (2015). Covalent Modification of Bacteriophage T4 DNA Inhibits CRISPR-  
632 Cas9. *mBio* 6, e00648.
- 633 42. Liu, Y., Dai, L., Dong, J., Chen, C., Zhu, J., Rao, V.B., and Tao, P. (2020). Covalent  
634 Modifications of the Bacteriophage Genome Confer a Degree of Resistance to Bacterial  
635 CRISPR Systems. *J Virol* 94.
- 636 43. Davidson, A.R., Lu, W.T., Stanley, S.Y., Wang, J., Mejdani, M., Trost, C.N., Hicks, B.T.,  
637 Lee, J., and Sontheimer, E.J. (2020). Anti-CRISPRs: Protein Inhibitors of CRISPR-Cas  
638 Systems. *Annu Rev Biochem* 89, 309-332.
- 639 44. Krylov, V.N., Smirnova, T.A., Minenkova, I.B., Plotnikova, T.G., Zhazikov, I.Z., and  
640 Khrenova, E.A. (1984). *Pseudomonas* bacteriophage phi KZ contains an inner body in its  
641 capsid. *Can J Microbiol* 30, 758-762.
- 642 45. van Beljouw, S.P.B., Haagsma, A.C., Rodriguez-Molina, A., van den Berg, D.F., Vink,  
643 J.N.A., and Brouns, S.J.J. (2021). The gRAMP CRISPR-Cas effector is an RNA  
644 endonuclease complexed with a caspase-like peptidase. *Science* 373, 1349-1353.
- 645 46. Ozcan, A., Krajcski, R., Ioannidi, E., Lee, B., Gardner, A., Makarova, K.S., Koonin, E.V.,  
646 Abudayyeh, O.O., and Gootenberg, J.S. (2021). Programmable RNA targeting with the  
647 single-protein CRISPR effector Cas7-11. *Nature* 597, 720-725.

649 **Supplementary Information**

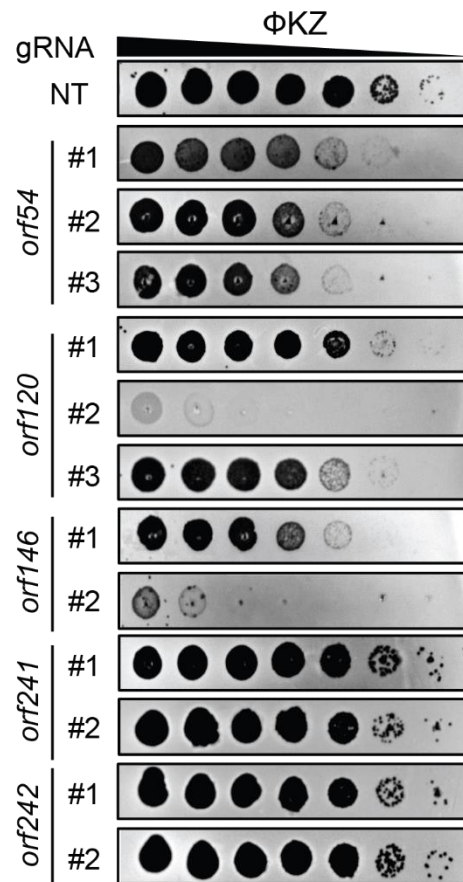

650

651

652 **Figure S1. Plaque efficiency assays of distinct crRNAs of CRISPR-Cas13a targeting**  
653 **transcripts of diverse ΦKZ genes.**

654 Different crRNAs show varied degrees of Cas13a interference efficiency against ΦKZ. NT, non-  
655 targeting.



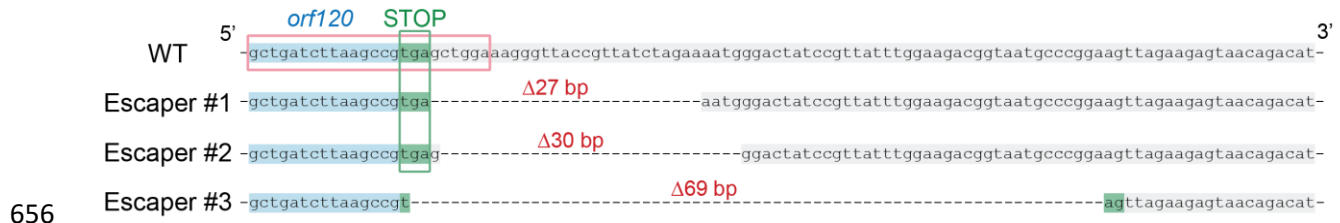

656

657

658 **Figure S2. Sequence alignment of wild type ΦKZ and three escaper mutants at the**  
659 **engineered genomic site.**

660 Escaper mutants were isolated and verified by PCR and sequencing. The WT *orf120* sequence  
661 is highlighted in blue and the downstream region is highlighted in grey. The stop codon (TGA) of  
662 *orf120* is highlighted in green and Escaper #3 reconstitutes it to TAG. The sequence in the red  
663 frame matches the spacer sequence of the crRNA that was used to target and eliminate WT  
664 phages. Deletions were indicated by dashed lines and their corresponding numbers of absent  
665 base pairs.

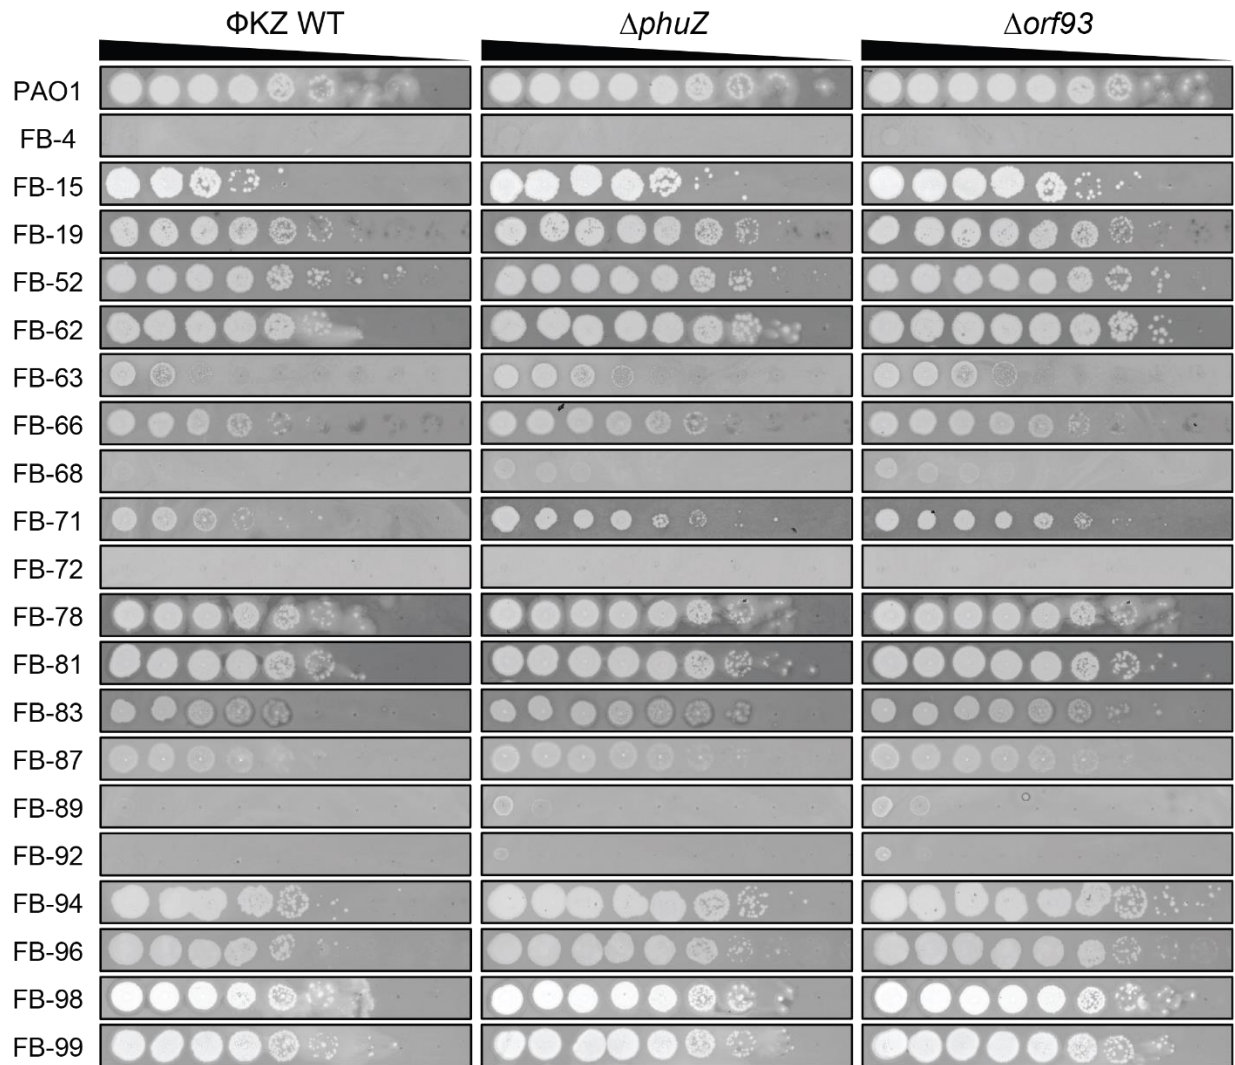

666

667

668 **Figure S3. Determination of host range of  $\Phi$ KZ  $\Delta$ *phuZ* and  $\Delta$ *orf93* mutants by plaque assay**  
669 **on *P. aeruginosa* clinical strains.**

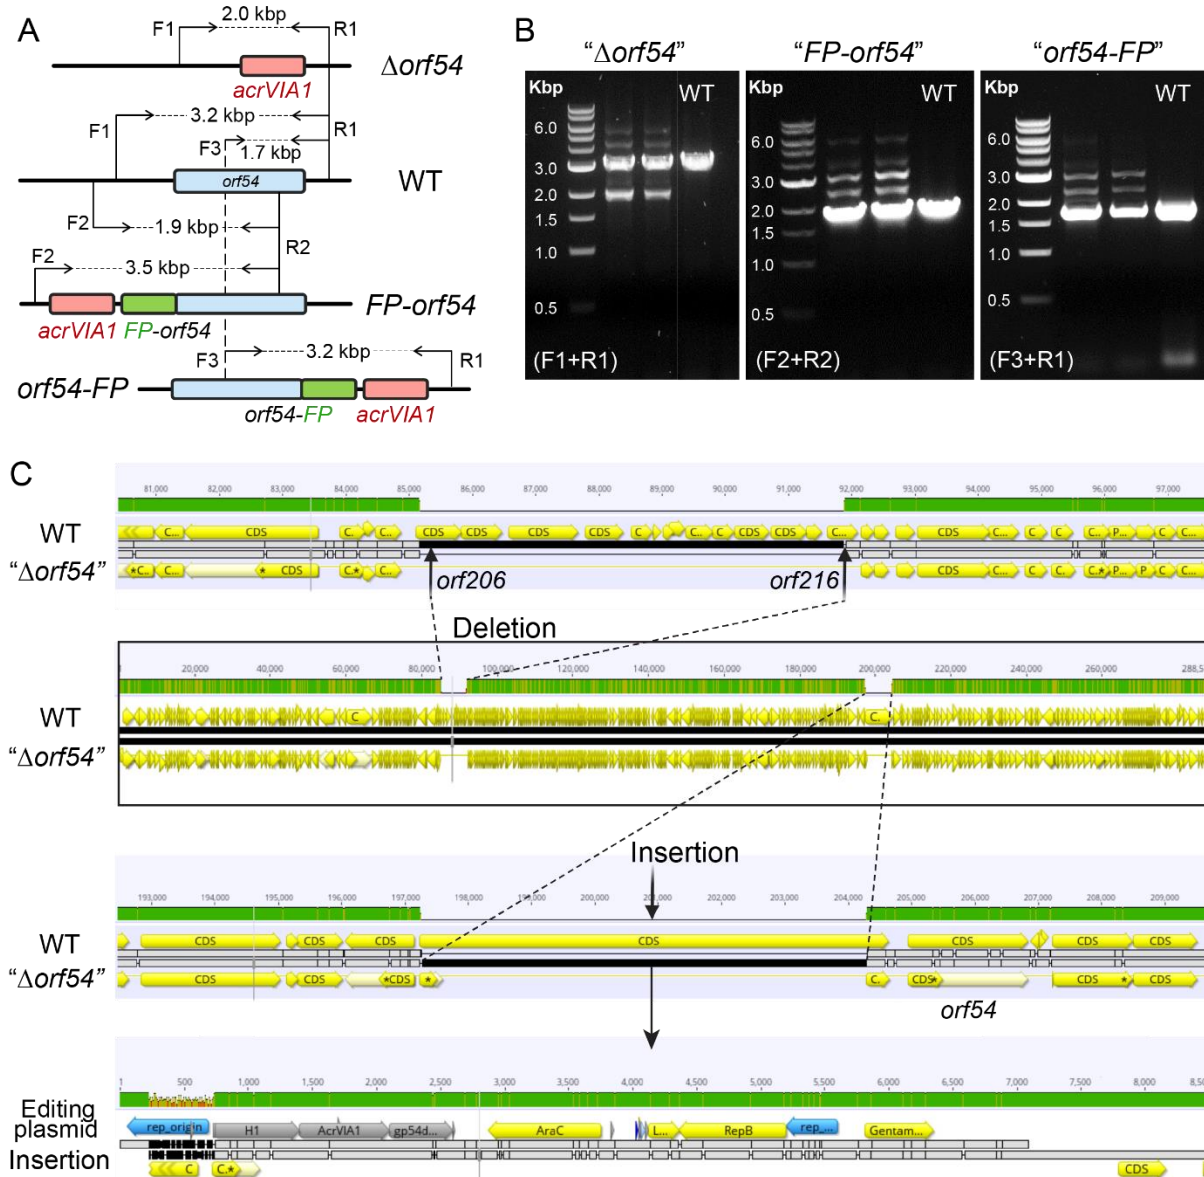

670

671

672 **Figure S4. Failure of genetic editing the shell gene (*orf54*) in  $\Phi$ KZ.**

673 (A) Schematic of genomes of WT  $\Phi$ KZ and three mutated *orf54* variants, " $\Delta$ *orf54*",  
 674 and "*orf54-FP*", at the editing site. *orf54*, *acrVIA1*, and fluorescent protein (FP) are shown as blue,  
 675 red, and green rectangles, respectively. F and R indicate forward and reverse primers,  
 676 respectively, for PCR confirmation of *orf54* engineering. (B) PCR confirmation of the indicated  
 677 *orf54* mutants using their corresponding pair of primers. All three mutants generated multiple  
 678 bands, including a band in the same size as the single band produced by WT. (C) Genome  
 679 alignment of WT phage with the isolated *orf54* "pseudo knock-out" mutant (" $\Delta$ *orf54*"). A gene  
 680 cluster of ~ 7 kbp (*orf206* - *orf216*) was missing in the mutant, likely as a result of phage packaging  
 681 capacity. The majority of the editing plasmid used to generate recombinants was at the editing  
 682 site, leaving the *orf54* intact.

683

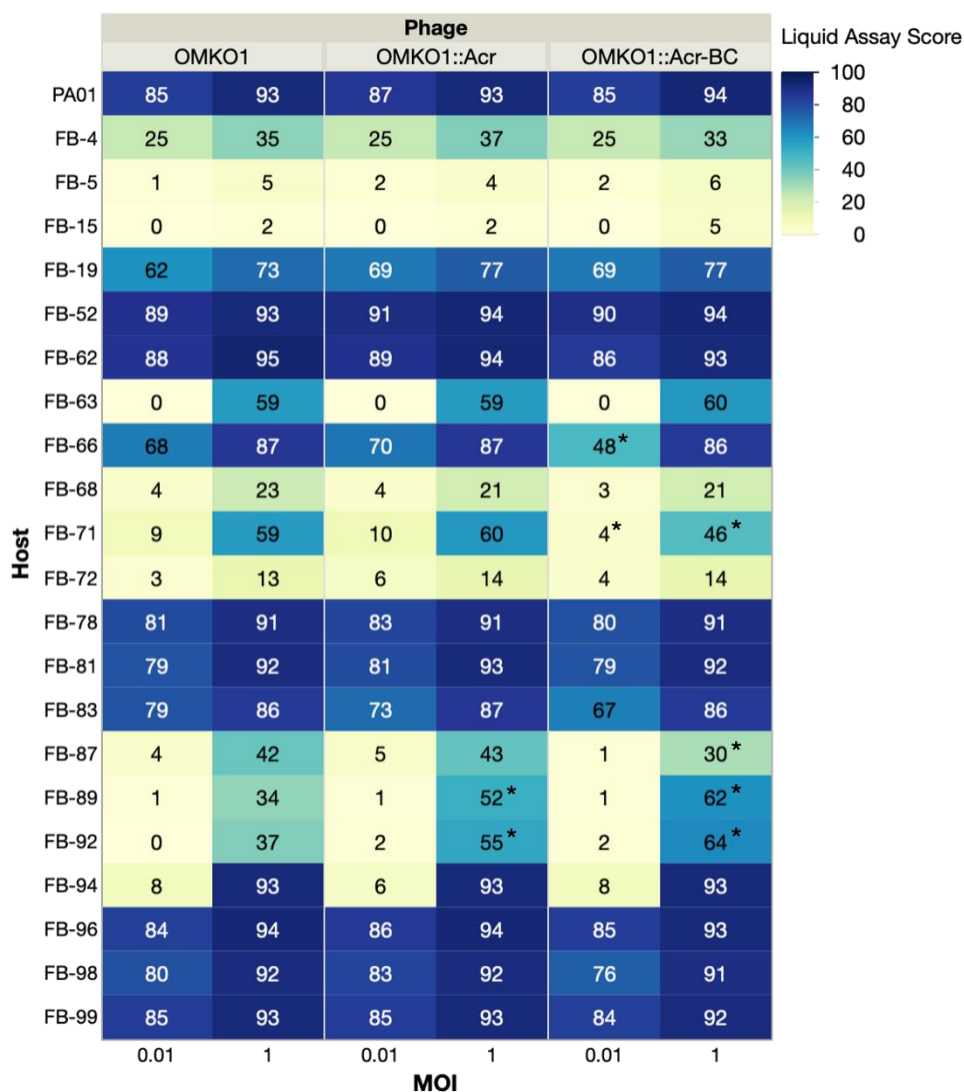

684

685

686 **Figure S5. Host range assay of engineered OMKO1 variants.**

687 Host ranges were determined by microplate liquid assay at MOI of 0.01 and 1 on 22 *P. aeruginosa*  
 688 clinical strains. The values are presented as the mean liquid assay scores across three  
 689 independent experiments. Asterisks (\*) indicate significant difference between WT and  
 690 engineered strains as determined by Students' T-test ( $p < 0.05$ ). The color intensity of each  
 691 phage-host combination reflects the liquid assay score, with the darker color the stronger intensity  
 692 displaying a greater score.

693 **Movie S1. Time-lapse movie of a *P. aeruginosa* cell infected by a  $\Phi$ KZ  $\Delta$ *phuZ* mutant phage.**

694 Phage DNA is stained by DAPI and shown in blue.

695

696 **Movie S2. Time-lapse movie of a *P. aeruginosa* cell infected by a  $\Phi$ KZ gp93-mNeonGreen**  
697 **mutant phage.**

698 Phage DNA is stained by DAPI and shown in blue. gp93-mNeonGreen is shown in green.

699

700 **Movie S3. Time-lapse movie of a *P. aeruginosa* cell infected by a WT  $\Phi$ KZ packaged with**  
701 **gp93-mNeonGreen fusion proteins in the capsid.**

702 Phage DNA is stained by DAPI and shown in blue. gp93-mNeonGreen is shown in green.



703 **Table S1. Bacterial strains and phages used in this work.**

| Name                     | Description                              | Source/Reference                                                                     |
|--------------------------|------------------------------------------|--------------------------------------------------------------------------------------|
| <b>Bacterial strains</b> |                                          |                                                                                      |
| PAO1                     | <i>P. aeruginosa</i>                     | Lab collection                                                                       |
| SDM084                   | PAO1 <i>tn7::Lse cas13a</i>              | [20]                                                                                 |
| BF#                      | <i>P. aeruginosa</i> CF clinical strains | Paul Turner Lab                                                                      |
| <b>Phages</b>            |                                          |                                                                                      |
| ΦKZ                      |                                          | Alan Davidson Lab                                                                    |
| JBD30                    |                                          | Alan Davidson Lab                                                                    |
| OMKO1                    | Clinical <i>P. aeruginosa</i> phage      | Paul Turner Lab                                                                      |
| PaMx41                   |                                          | Gabriel Guarneros Peña at Centro de Investigación y de Estudios Avanzados (KU884563) |

704

705

706 **Table S2. crRNA sequences.**

| Phage                        | Target        | Type                      | No.          | Sequence (5' - 3')                 |
|------------------------------|---------------|---------------------------|--------------|------------------------------------|
| <b>JBD30</b>                 | <i>orf38</i>  | VI-A                      |              | acgccaatctctgctacgacggtc           |
| <b>ΦKZ</b>                   | <i>orf54</i>  | VI-A                      | #1           | tcaaactcaagctactgctcctgc           |
|                              |               |                           | #2           | atgctcgttcagcagatgccctac           |
|                              |               |                           | #3           | ggtatggctggctactcattgtt            |
|                              | <i>orf120</i> |                           | #1           | cttaagccgtgagctggaaagggt           |
|                              |               |                           | #2           | gctgatcttaagccgtgagctgga           |
|                              |               |                           | #3           | agcttgctgatcttaagccgtgag           |
|                              | <i>orf146</i> |                           | #1           | ttcactggttgaaactaatga              |
|                              |               |                           | #2           | ggcttctgcattgaagattatgt            |
|                              | <b>PaMx41</b> |                           | <i>orf11</i> | VI-A                               |
| #2                           |               | agactggctgatatctcggctgcta |              |                                    |
| #3                           |               | aaagagcgcgtatatctgaccgcc  |              |                                    |
| #4                           |               | gtcaagcgtcagactggctgatatc |              |                                    |
| #5                           |               | tcaatctaccgtcaagcgtcaga   |              |                                    |
| #6                           |               | ctcggctgctatcatcgctgcgaa  |              |                                    |
| <i>orf04</i><br><i>orf28</i> |               | I-C                       | #1           | tgatacgaaggaaattgicgcaattggcgataga |
|                              |               |                           | #2           | atttctgactttaataggaggccgaattccata  |
| <i>orf14</i><br><i>orf42</i> |               | I-F                       | #1           | tctcagcgtaatagtcctgttcttctggcag    |
|                              |               |                           | #2           | ttcttctatttctcccagaatcttccgcaat    |
| <i>orf06</i><br><i>orf20</i> |               | II-A                      | #1           | tttattactgttgaccctgc               |
|                              |               |                           | #2           | ttccagcatagttctatac                |
| <i>orf23</i><br><i>orf46</i> |               | V                         | #1           | tggagaatgaagaaggtaaggta            |
|                              |               |                           | #2           | agaatatgccttgcattagtag             |

707

**Table S3. Primers.**

| No.   | Description                     | Name              | Sequence (5' - 3')                                            |
|-------|---------------------------------|-------------------|---------------------------------------------------------------|
| JG003 | mNeonGreen                      | mGreen-F          | CCAATATTCTCGAGGGTGGCGGTGGCTCGATGGTGAGCAAGGGCG                 |
| JG004 |                                 | mGreen-pHERD-R    | GACTCTAGAGGATCCCCGGGTACCTTACTTGTACAGCTCGTCC                   |
| JG010 | gp93                            | IB3-SacI-F        | AGCATC GAATTCGAGCTCC ATGTCTCTACTTAAAATGCT                     |
| JG011 |                                 | IB3-XhoI-R        | AGCATC CTCGAG CTTCTCATCATTCTCAGGTG                            |
| JG075 | H1 for insertion at gp120 3'UTR | pHERD-gp120H1-F   | CCATGGGATCTGATAAGAATTC CCTAGG GTAATGCGTCCGACCTATCG            |
| JG064 |                                 | gp120-muH1stop-R  | GATCATTTTTTATTCTACGTAGG CTCGAG<br>CTAAGGTTTTAAGTCGGCAAGCTTACC |
| JG029 | H2 for insertion at gp120 3'UTR | gp120-H2-KpnI-F   | AGCATC GGTACC CATATG GCTGGAAAGGGTTACCGTTA                     |
| JG030 |                                 | gp120-H2-Sall-R   | AGCATC GTCGAC CAACAAAACGTGAGACAGGG                            |
| JG046 | Check insertion at gp120 3' UTR | CheckFP-inphage-R | AGTGCTTCTTCTTCTGGACTAAGTC                                     |
| JG047 |                                 | CheckFP-inphage-F | GTGGTACTATCAGCCTATCCAAAGG                                     |
| JG065 | AcrVIA1                         | AcrVIA1-XhoI-F    | AGGCCC CTCGAG CCTACGTAGGAATAAAAA ATGATCTACTATATAAAAG          |
| JG066 |                                 | AcrVIA1-NdeI-R    | CGGCCC CATATG TTAATTTAGCTCCTCTTTTA                            |
| JG088 | Check the existance of AcrVIA1  | AcrVIA1-mid-F     | TCCGTTGCTCCCGATACGA                                           |
| JG095 | H1 for mCherry-gp54 fusion      | pHERD-Op24NheI-F  | GCCTTTTGCTGGCCTTTTGCTCACATAAG TTGAAGACCCGCCACTATATTTAGG       |
| JG096 |                                 | Op24H1-AcrVIA-R   | CACTTTTAAATCTTTTATATAGTAGATCAT TTTAAATACCTTTACGATTATGG        |
| JG097 | AcrVIA1 for mCherry-gp54 fusion | Op24H1-AcrVIA-F   | CAAGAAACCATAATCGTAAAGGTATTTAAA ATGATCTACTATATAAAAGA           |
| JG098 |                                 | AcrVIA-mCherry-R  | CACCATTTTTTATTCTACGTAGGCCTAGG TTAATTTAGCTCCTCTTTTA            |
| JG099 | H2 for mCherry-gp54 fusion      | AcrVIA-mCherry-F  | AATTAACCTAGGCCTACGTAGGAATAAAAA ATGGTGAGCAAGGGCGAGGA           |
| JG100 |                                 | pHERD-gp54NheI-R  | TGCTCTGCGAGGCTGGCCGATAAGCTAG ATGTGGGTCGCAATAGAGAACGGAG        |
| JG104 | H1 for gp54-gfp11 fusion        | pHERD-gp54end-F   | GCCTTTTGCTGGCCTTTTGCTCACATAAG GAGCAAGTCATCCTAGATGCA           |
| JG105 |                                 | gp54end-gfp11-R   | CATGTGGTCACGCGAGCCGCCCGACCCGCC GTACCAGGTACCCGGTGCAT           |

|       |                             |                                             |                                                         |
|-------|-----------------------------|---------------------------------------------|---------------------------------------------------------|
| JG106 | H2 for gp39 deletion        | KO39H2-F                                    | ATTAACTTATACTGGAGCCCTTCGG                               |
| JG107 |                             | pHERD-KO39H2-R                              | TGCTCTGCGAGGCTGGCCGATAAGCTAG CTTTTTAGCAGTGTTCTTTGCC     |
| JG050 | Check gp54 editing          | gp54-mid-R                                  | CAGTGGTCGGAGTCCAATGTAGATC                               |
| JG108 |                             | Check-recomb54-F                            | AGTTTGAGGACCAAGTGTAACACC                                |
| JG118 |                             | Check-KO54-R                                | GTGGGTTAATTAGGCTACGTACGTG                               |
| JG110 |                             | pHERD-gp54NheI-F                            | GCCTTTTGCTGGCCTTTTGCTCACATAAG CTGCATTTTATAAAAATACTG     |
| JG111 | gp54                        | pHERD-gp54NheI-R                            | TGCTCTGCGAGGCTGGCCGATAAGCTAG TTAGTACCAGGTACCCGGT        |
| JG127 |                             | gp54-PstI-F                                 | AGCATC CTGCAG ATGGCTGTAAACGAAAACGA                      |
| JG128 |                             | gp54-SacI-R                                 | AGCGTC GAGCTC TTAGTACCAGGTACCCGGTGCATTATAG              |
| JG112 |                             | AcrVIA1 for gp54 deletion (pair with JG097) | AcrVIA-Op24H2-R                                         |
| JG113 | H2 for gp54 deletion        | AcrVIA-Op24H2-F                             | GCAAACAAATTTTAAAAGAGGAGCTAAATTA TAGGAAATACCTCGGTAGATAGG |
| JG114 |                             | pHERD-Op24H2NheI-R                          | TGCTCTGCGAGGCTGGCCGATAAGCTAG CTTTCTCATCTGAGTTAC         |
| JG119 | H2 for gp93 deletion        | KO93H2-F                                    | CAAACATAATGAGGAACCCTTCGG                                |
| JG120 |                             | pHERD-KO93H2-R                              | TGCTCTGCGAGGCTGGCCGATAAGCTAG CATAAAAGCAGCTGATTGTTA      |
| JG121 | Check gp93 deletion         | Check-KOgp93-R                              | AGTTAGTACACGCTGTGCCGCT                                  |
| JG122 | gp39                        | pHERD-gp39-NheI-F                           | GCCTTTTGCTGGCCTTTTGCTCACATAAG ATTATATTAATCACAATGAGG     |
| JG123 |                             | pHERD-gp39-NheI-R                           | TGCTCTGCGAGGCTGGCCGATAAGCTAG TTAATCGAATACAAGACCACTACT   |
| JG124 | H1 for gp241-gp242 deletion | pHERD-KO2412-H1Acr-F                        | GCCTTTTGCTGGCCTTTTGCTCACATAAG TTAATAAAGATAACTTCTTTTC    |
| JG125 |                             | KO2412-H1Acr-R                              | CCTTTTAGTTAATTTAATTTAGCTCCTCTTTTAAAATTTG                |
| JG126 | Check gp241-gp242 deletion  | Check-KO2412-R                              | GGCTAAGTCTTTTTCTCGATACTGG                               |
| JG133 | Operon#24                   | pHERD-Op24NheI-F                            | GCCTTTTGCTGGCCTTTTGCTCACATAAG TACGTGACGGAGCATTCTTAAATA  |
| JG134 |                             | pHERD-Op24NheI-R                            | TGCTCTGCGAGGCTGGCCGATAAGCTAG CCCGAAGGAGCCGCTATATCAG     |

|       |                                                           |                     |                                                               |
|-------|-----------------------------------------------------------|---------------------|---------------------------------------------------------------|
| JG135 | H1 for insertion at the 3'UTR of the capsid gene in OMKO1 | Omk-capH1-GibsonF   | GCCTTTTGCTGGCCTTTTGCTCACATAAG ATCGAAGGCGCACTATCCGCTG          |
| JG136 |                                                           | Omk-capmuH1-GibsonR | GATCATTTTTTATTCTACGTAGG GCTAGC<br>CTAAGGTTTTAAGTCGGCAAGCTTACC |
| JG137 | H1 for insertion at gp54 5'UTR                            | pHERD-Op24InH1-F    | GCCTTTTGCTGGCCTTTTGCTCACATAAG GGAGCATTCTTAAATAAATTA           |
| JG138 |                                                           | Op24InH1-RBS-R      | GATCATTGTATATTCTATTTGTAAT CTCGAG CGTAACGAACACTATGTT           |
| JG139 | AcrVIA1 for insertion at gp54 5'UTR                       | gp53RBS-AcrVIA1-F   | CTCGAG ATTACAAATAGGAATATACA ATGATCTACTATATAAAAGA              |
| JG140 |                                                           | AcrVIA1-Op24InH2-R  | CGCTATAATCTGCTATCAGCAGAT CCTAGG TTAATTTAGCTCCTCTTTTA          |
| JG141 | H2 for insertion at gp54 5'UTR                            | AcrVIA1-Op24InH2-F  | AGGAGCTAAATTA CCTAGG ATCTGCTGATAGCAGATTATAGCG                 |
| JG142 |                                                           | pHERD-Op24InH2-R    | TGCTCTGCGAGGCTGGCCGATAAGCTAG GTTGTAAACGGTTCCTAG               |
| JG146 | H1 for gp146 deletion                                     | pHERD-KOgp146H1-F   | GCCTTTTGCTGGCCTTTTGCTCACATAAG AGCTATTGCAAATGCGGTACC           |
| JG147 |                                                           | KOgp146H1-AcrR      | TAGATCATTTTTATTTCTTGCTGTATAAGAA CATTATACTACTTCTCAAGTTCCG      |
| JG148 | Check gp146 deletion                                      | Check-gp146edit-R   | AATCTATCCCAGTTCAAGCTAAGCC                                     |
| JG152 | AcrVIA1 for gp146 deletion                                | gp145RBS-AcrVIA1-F  | TTCTTATACAGCAAGGAAATAAAA ATGATCTACTATATAAAAGAT                |
| JG153 |                                                           | AcrVIA1-Op63InH2-R  | GGAGGGCAATATGTCTGTT TTAATTTAGCTCCTCTTTTAAAAT                  |
| JG154 | H2 for gp146 deletion                                     | AcrVIA1-Op63InH2-F  | AAAGAGGAGCTAAATTA AACGACATATTGCCCTCCCTTCGG                    |
| JG155 |                                                           | pHERD-Op63InH2-R    | TGCTCTGCGAGGCTGGCCGATAAGCTAG ATTCCATTTATTATTCAATTAATAGCT      |
| JG156 | gp146                                                     | pMMB-gp146-GbF      | GGAAACAGAATTAATTAAGCTTGCATGC CTGCAG ATGGCTTCTGCATTTGAAGA      |
| JG157 |                                                           | pMMB-gp146-GbR      | CCGCCAAAACAGCCAAGCTGAATTC GAGCTC TTAATAACAGCACCTTTGG          |
| JG160 | H2 for gp241 deletion                                     | AcrVIA1-KO241H2-F   | CAAACAAATTTTAAAAGAGGAGCTAAATTAATAAGAGCATATGGCCCTCCCTTCGG      |
| JG161 |                                                           | pHERD-KO241H2-R     | TGCTCTGCGAGGCTGGCCGATAAGCTAG TAATAGTGGTATTAACCTTGTAG          |
| JG162 | Check gp241 deletion                                      | Check-KOgp241-R     | CGGGTGTAATCGTACGTAGATCAATCGC                                  |
| JG166 | H2 for gp241-gp242 deletion                               | KO2412-H2-F         | GAGGAGCTAAATTAATTA ACTAAAAGGTAAAAAATGAATAATC                  |
| JG167 |                                                           | pHERD-KO2412-H2-R   | TGCTCTGCGAGGCTGGCCGATAAGCTAG CATCCTTATTATGGAAGCTATA           |

|          |                                        |                  |                                                               |
|----------|----------------------------------------|------------------|---------------------------------------------------------------|
| JG168    | Check orf24 deletion in PaMx41         | Check-PaM24-R    | CTCGTGGTGATGTTAACCCCTAGGG                                     |
| JG169    |                                        | Check-PaM24-F    | CAACTCTGAATTCCGAAGCTGAGGCC                                    |
| JG170    | Check gp93 deletion                    | Check-KOgp93-F   | ACTCTTGATATCCAATCTGTAGCGG                                     |
| JG173    | gp39                                   | gp39-SacI-F      | ACCCATGGGATCTGATAAGAATTCGAGCTC ATGATGTCTAAAGTAAAACTCG         |
| JG174    |                                        | gp39-KpnI-R      | CAGGTCGACTCTAGAGGATCCCCGGGTACC TTAATCGAATACAAGACCACTACT       |
| JG175    | H1 for Operon#42 deletion              | pHERD-KOop42H1-F | GCCTTTTGCTGGCCTTTTGCTCACATAAGTAACCTACCTTCTTTACTAATGCAGA ATAG  |
| JG176    |                                        | KOop42H1-R       | CTTTTAAATCTTTTATATAGTAGATCAT TTTTCTCTTCCTATATGGGTTTGCAGAG     |
| JG178    | gfp1-10                                | pHERD-gfp10-GbF  | ACCCATGGGATCTGATAAGAATTC GAGCTC ATGGTGAGCAAGGGCGAGGA          |
| JG179    |                                        | pHERD-gfp10-GbR  | GGCCAGTGCCAAGCTTGCATGC CTGCAG CTTCTCGTTGGGGTCTTTGCTC          |
| JG180    | Check gfp11-gp54 and gp54-gfp11 fusion | gfp11-mid-F      | TGGTCCTTCATGAGTATGTAAATGC                                     |
| JG181    | Check gp39 deletion                    | Check-KOgp39-R   | CTTCAGCCCATTGTCTACCCG                                         |
| JG182    | H1 for gp93-mNeonGreen fusion          | gp93-mNGH1-Gb-F  | GCCTTTTGCTGGCCTTTTGCTCACATAAG AATCCGAAGACTATTGCAGACTTCA       |
| JG183    |                                        | gp93-mNGH1-Gb-R  | CTATATGGGTTTGCGGTTCCTCATTATGTTTGTTA TTACTIONGTACAGCTCGTCCAT   |
| JG186    | Check Operon#42 deletion               | Check-KOop42-F   | CACCAATAAAGTCACCAGTACGTCC                                     |
| JG187    | Check gp93-mNeonGreen fusion           | gp93-mid-F       | GCCCTAGCTGATTGGAATCCTGACG                                     |
| oSDM 455 | pHERD30T-crRNA Version 3               | Lse_crRNA_V3_Top | ACTCTCTACTGTTTCTCCATGGTAAGAGACTACCTCTATATGAAAGAGGACTAAAA CCGA |
| oSDM 456 |                                        | Lse_crRNA_V3_Bot | CGGGTACCGAGCTCGAATTCGAGACCGTACGTACGTGGTCTCGGTTTTAGTCCTC TTTCA |
| oSDM 457 |                                        | p30T_TSS-R       | ATGGAGAAACAGTAGAGAGTTG                                        |



|             |                                 |                     |                                                                                    |
|-------------|---------------------------------|---------------------|------------------------------------------------------------------------------------|
| oSDM<br>458 | pHERD30T-<br>crRNA<br>Version 2 | p30T_TSS-F          | GAATTCGAGCTCGGTACC                                                                 |
| oSDM<br>465 |                                 | LseCas13 crRNA V2 F | ACTCTCTACTGTTTCTCCATGGTAAGAGACTACCTCTATATGAAAGAGGACTAAAA<br>CCGAGACCACGTACGTACGGTC |
| oSDM<br>466 |                                 | LseCas13 crRNA V2 R | CGGGTACCGAGCTCGAATTCGTTTTTGTGGAGATTCATATTCTCCAAGTCTCTTAC<br>CCGAGACCGTACGTACGTGGTC |
